## How molecular mechanisms of resistance affect resistance evolution

*Fabrizio Clarelli<sup>1</sup>, Bhupender Singh<sup>1</sup>, Adam Palmer<sup>2</sup>, Sören Abel<sup>1,3</sup>, Ted Cohen<sup>4</sup>, Pia Abel zur Wiesch<sup>1,3</sup>*

**1.** Department of Pharmacy, Faculty of Health Sciences, University of Tromsø, Tromsø, Norway. **2.** Laboratory of Systems Pharmacology, Harvard Medical School, Boston, MA, USA. **3.** Centre for Molecular Medicine Norway, Nordic EMBL Partnership, Oslo, Norway. **4.** Department of Epidemiology of Microbial Diseases, Yale School of Public Health, New Haven, Connecticut, United States of America.

## Abstract

Antibiotic treatment may be compromised by the sporadic appearance and selection of drug resistant mutants during therapy. Identifying optimal dosing strategies for treating bacterial infections that minimize the risk of resistance is difficult, and improving dosing guidelines usually requires long and costly *in vitro* and *in vivo* experimentation. Previously, we proposed a mathematical model that links bacterial population biology with chemical reaction kinetics and demonstrated that this model had high predictive and explanatory power for antibiotic pharmacodynamics. Here, we extend our model to incorporate several distinct molecular mechanisms of resistance, e.g. altered drug-target affinity or target molecule content, to explore the how these mechanisms affect the risk of acquired resistance during treatment.

Our model is based on a system of partial and ordinary differential equations. The central assumption encoded in the model is that bacterial growth declines (and/or bacterial kill rate increases) as the fraction of bound antibiotic target molecules within the bacterium increases. We use experimental data from *E. coli* exposed to ciprofloxacin and ampicillin to estimate the dependence of bacterial growth and death on the fraction of bound target molecules and to calibrate our model. We then predict how several alternative molecular mechanisms of resistance should affect bacterial growth and compare these predictions with data from experimentally-manipulated bacteria with varying target molecule content. Finally, we use our model to estimate antibiotic susceptibility for different antibiotics that share similar mechanisms of action but differ in their drug-target affinity.

Our extended model offers a novel approach for predicting how resistance will evolve during therapy and provides a framework for generating new testable hypotheses about how the risk of resistance depends on the molecular mechanism of resistance.

## Introduction

The emergence and spread of antibiotic resistance is a major threat for global public health. Despite the magnitude of the problem, we have limited knowledge how to employ antibiotics in a way that maximizes treatment efficacy while minimizing resistance [1]. Whether optimal treatment outcomes are best achieved under higher or lower antibiotic exposure is a matter of intense debate [2-4]. As early as 1913, Paul Ehrlich recommended strategies that “hit hard” in order to maximize efficacy of antibiotic treatment [5]. The underlying intuition supporting such approaches is that high doses of antibiotics provide a obstacle to the emergence of resistance by suppressing the appearance of mutants that possess intermediate resistance; this “hit hard” recommendation has been supported by many experimental and theoretical studies. Conversely, high doses of antibiotics create a greater selective pressure in favor of extant resistant mutants, and in some situations “hitting hard” may result in a greater risk of antibiotic resistance [6]. The competing consequences of high dose antibiotic treatment (i.e. suppression of the rise of intermediately resistant mutants and selection of existing resistant mutants) have been consolidated in the concept of a resistance-selection window [7, 8]. This window is the worrisome range of antibiotic concentrations in which growth of the susceptible (wild-type) strain is sufficiently impaired that resistant strains with a single resistance mutation can be expected to have a higher replication rate, i.e. higher fitness. At the same time, the antibiotic concentration is not high enough to eradicate all possible strains with a single resistance mutation. Antibiotic concentrations above the mutation-selection window are expected to safeguard against *de novo* resistance emergence during treatment. Antibiotic concentrations below the mutation selection window do not kill the susceptible strain, but also do not sufficiently favor the resistant strain to allow for out competition and emergence of resistance. While these concepts are useful, we note that it is rarely known the precise concentrations that select for resistance.

One challenge for predicting optimal antibiotic dosing to suppress resistance is that there are often several different mutations that can lead to resistance to a single drug [9], and each of these mutations may affect bacterial susceptibility and bacterial fitness in different ways. Tools that facilitate predictions of the susceptibility of the bacterial population from the possible molecular mechanisms of resistance would thus be useful. In this manuscript, we use a mechanistic mathematical model that describes the effect of intracellular reaction kinetics on bacterial populations [9] to investigate how different mechanisms of antibiotic resistance affect antibiotic susceptibility. We also consider how modifications to existing antibiotics, for example, small chemical modifications that increase their target affinity (as it has been done with each generation of quinolones [10]), may be leveraged to improve treatment outcomes.

## Methods

We introduce a mathematical model based on a system of partial and ordinary differential equations. Similar to [1], the model describes the binding and unbinding of antibiotics to their target and how this affects bacterial growth and death. The model includes two mass balance equations, one for antibiotics and one for bacteria.

### *Binding kinetics*

The total number of available target molecules  $\theta$  is assumed to be a constant, the association rate is  $k_f$ , the dissociation rate is  $k_r$  and the number of bound targets  $x$  ranges between 0 and  $\theta$ .

In a first model, we ignore differences between extracellular and intracellular antibiotic concentrations, and only follow the total antibiotic concentration  $A$  and assume that the time needed for drug molecules to enter bacterial cells is negligible. This first model is therefore most

appropriate for describing antibiotic action where the diffusion barrier to the target is weak (e.g. because the target is in the cell envelope as is the case for beta-lactams).

In [1], the association and dissociation terms are described by the following terms

$$\frac{dB_i(t)}{dt} = \overbrace{\hat{k}_f A(t) ((\theta - (i - 1)) B_{i-1}(t) - (\theta - i) B_i(t))}^{\text{Association term}} - \overbrace{k_r (i B_i(t) - (i + 1) B_{i+1}(t))}_{\text{Dissociation term}}; \quad i \in [0 : \theta]$$

where  $\hat{k}_f = \frac{k_f}{V_{\text{tot}} n_A}$ , and  $k_f$  is the association rate,  $V_{\text{tot}}$  is the volume containing all bacteria and drug molecules,  $n_A$  is the Avogadro number,  $k_r$  is the dissociation rate,  $B_i$  is the number of bacteria with  $i$  bound targets and  $\theta$  is the total number of targets.

This approach requires the use of a large number of differential equations ( $\theta + 2$ ). To simplify and generalize this approach, we now assume that the variable of bound targets is a real number  $x \in \mathcal{R}$ . Under this continuity assumption, we consider the bacterial cells as a function of  $x$  and the time  $t$ , thereby reducing the total number of equations to two.

Under the continuity approximation ( $x \in \mathcal{R}$ ), we can rewrite the equation in the form

$$\frac{\partial B(x, t)}{\partial t} + \overbrace{\frac{\partial}{\partial x} (\hat{k}_f A(t) ((\theta - x) B(x, t)))}^{\text{Association term}} - \overbrace{\frac{\partial}{\partial x} (k_r x B(x, t))}_{\text{Dissociation term}}$$

or simply

$$\frac{\partial B(x, t)}{\partial t} + \frac{\partial}{\partial x} (v_f(x, t) B(x, t) - v_r(x, t) B(x, t))$$

where  $v_f = \hat{k}_f A(t)(\theta - x)$  and  $v_r = k_r x$  can be considered as two velocities, i.e. the derivative of the bound targets with respect to the time  $\frac{dx}{dt}$ .

### *Replication rate*

We assume that living bacteria replicate with a rate  $r(x)$  depending on the number of bound target molecules. The function  $r(x)$  is assumed to be a monotonically decreasing function of  $x$ ; i.e. the more target is bound, the less bacteria replicate.  $r(0)$  is the maximum growth rate, corresponding to the replication rate of bacteria in absence of antibiotics. Thus,  $r(x)$  describes the bacteriostatic action of the antibiotics, i.e. the effect of the antibiotic on bacterial replication.

### *Carrying capacity*

Replication ceases when the total bacterial population approaches the carrying capacity  $K$ . Thus, we can write the replication term as

$$\frac{\partial B(x, t)}{\partial t} = r(x)B(x, t) \frac{K - \int_0^\theta B(x, t) dx}{K} = r(x)B(x, t)F_{lim}(x, t)$$

where  $F_{lim}$  is the growth limiting term due to the carrying capacity  $K$ , and  $0 \leq F_{lim} \leq 1$ .

### *Distribution of target molecules upon division*

We assume that the total number of target molecules doubles at replication, such that each daughter cell has the same number as the mother cell. We also assume that the total number of drug-target complexes is preserved in the replication, and the distribution of  $x$  bound target molecules of the mother cell to its progeny is described by a hypergeometric sampling of  $n$  molecules from  $x$  bound and  $2\theta - x$  unbound molecules. Under the continuity assumption, we must generalize the concept of hypergeometric distribution. Since the hypergeometric distribution is a function of combinations, and a combination is defined as function of factorials, we can use  $\Gamma$  functions in place of factorials, and redefine a continuous hypergeometric distribution as a function of  $\Gamma$  functions. A  $\Gamma$  function is

$$\Gamma(z) = \int_0^\infty x^{z-1} e^{-x} dx, \quad \text{Re}(z) > 0$$

where  $z$  is a complex number. In this way, the distribution can now be expressed as a probability density function of continuous variables.

In other words, the quantity of new bacteria is given by the term  $r(x)B(x, t)F_{lim}(t)$ , but twice this quantity must be redistributed along  $x$ . For illustration, if a mother cell with 4 bound targets divides, we have two daughter cells, each with a number of bound targets between 0 and 4 (their sum has to be 4), following the generalized hypergeometric distribution. For simplicity, we define  $S(x, t)$  to be a function related to the replication rate which depends on the number of bacteria with a number of bound target molecules ranging between  $x$  and  $\theta$ , their specific replication rate  $r(x)$  and the fraction of their daughter cells expected to inherit  $x$  antibiotic-target complexes  $h(x, z)$ :

$$S(x, t) = 2 \int_x^\theta h(x, z)r(z)B(z, t)dz, \quad Re(z) > 0$$

#### *Death rate*

Here, we define the death rate function  $\delta(x)$ , which depends on the number of bound target molecules. The function  $\delta(x)$  is assumed to be a monotonically increasing function of  $x$ , where  $\delta(\theta)$  is the maximum death rate, when the bacteria have all targets bound. The shape of the death rate describes the bactericidal action of the antibiotic, i.e. what is the minimal number of bound targets to initiate bactericidal action and at what threshold of bound targets is bactericidal action maximized.

#### *Bacteriostatic and bactericidal effects*

We consider several functional forms of the relationship between the percentage of bound targets and growth and death rates (Figure 1: step function, sigmoidal, linear). With sufficient experimental data, the growth rate  $r(x)$  and/or the death rate  $\delta(x)$  can be obtained by fitting our model to time-kill curves of bacterial populations after antibiotic exposure.

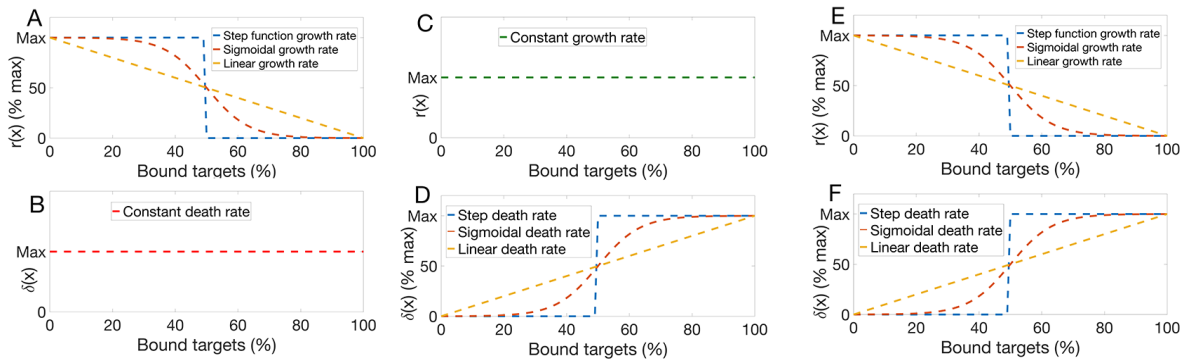

Figure 1. **Bacteriostatic and bactericidal effects.** In the figure, we can see a bacteriostatic effect in the left column: in (A) there are different growth rates, varying between a step function to a linearly decreasing function, passing through sigmoidal functions. In (B) there is a constant death rate. In the central column, we can see a bactericidal effect: in (C) a constant growth rate, in (D) a death rate function varying from a step function to a linear increasing function, passing, like in the previous case, through sigmoidal functions. On the right column, we have a bacteriostatic and bactericidal action of the drug, i.e. a composition of the variable growth rate (E) with a variable death rate (F).

The sigmoidal shape of  $r(x)$  and  $\delta(x)$  can be written as:

$$r(x) = \frac{r_0}{1 + e^{\gamma_r(x-x_{rth})}} \quad \delta(x) = \frac{d_{max}}{1 + e^{-\gamma_d(x-x_{dth})}}$$

where  $x_{rth}$  is the growth rate threshold,  $x_{dth}$  is the death rate threshold, and both of them represent the point where the sigmoidal function reaches  $1/2$  of its maximum.  $\gamma_r$  and  $\gamma_d$  are the shape parameters respectively of the sigmoidal growth and death rate functions.

*Full equation describing bacterial population*

Finally, the full equation of bacteria is

$$\frac{\partial B(x,t)}{\partial t} + \frac{\partial}{\partial x} (v_f(x,t)B(x,t) - v_r(x,t)B(x,t)) =$$

$$\underbrace{-r(x)B(x,t)F_{lim}(x,t) + S(x,t)F_{lim}(x,t)}_{\text{Reproduction terms}} - \underbrace{\delta(x)B(x,t)}_{\text{Death term}}$$

where  $B(x,t)$  is the number of bacteria.

*Equation describing antibiotic concentration*



The equation describing antibiotic concentration is given simply by the mass conservation, i.e. subtracting all the molecules associated in the complexes drug-target and adding all the molecules dissociated. The antibiotic equation is

$$\frac{dA(t)}{dt} = -\hat{k}_f A(t) \int_0^\theta (\theta - x) B(x, t) dx + k_r \int_0^\theta x B(x, t) dx$$

Where  $A(t)$  represents the number of drug molecules.

### *Initial and boundary conditions*

To close the system of our equations, we must specify the initial and boundary conditions. At  $t=0$ , we assume that all bacteria have zero bound targets, i.e.  $x = 0$ , and the initial drug concentration is  $C(0) = C_0$ .

On the boundaries ( $x = 0, x = \theta$ ) of the partial differential equation, we specify that the outgoing velocities are zero. Thus, for  $x = 0$ , we have  $v_r(0, t) = 0$ , and in  $x = \theta$  we have that  $v_f(\theta, t) = 0$ . Specifying this structure of our velocities permits us to solve the partial differential equation (using a finite differences scheme at the first order in space and time approximations) simplifying our needs on the boundary conditions; in other words we have the same conditions in  $x = 0$  and  $x = \theta$  present in [1].

To solve this system, we use a finite differences numerical scheme at the first order in space and time. Additional information and how this numerical scheme is developed can be found in [11, 12].

### *Description of beta-lactam action*

Beta-lactams acetylate penicillin-binding proteins (PBPs, the target molecules), and thereby inhibit cell wall synthesis. The acetylation of PBPs consumes beta-lactams, and therefore the drug-target reaction is not reversible. To include this effect in our model, we modify the term of drug-target dissociation. In the equation describing antibiotic concentration, the unbinding rate  $k_r=0$ , while, in the bacteria equation, we substitute the dissociation rate  $k_r$  with the deacetylation rate  $k_a$ , see [13].

## Results

### *Model validation*

First, we use time-kill curves with the beta-lactam ampicillin, for which most parameters have been experimentally determined (see table 1) to explore how well our modeling approach describes experimental data. It is difficult to determine  $r(x)$  and  $\delta(x)$  (the dependence of bacterial replication and death rates on the number of bound target molecules, respectively) experimentally. In single cell analyses, ampicillin was found to have no effect on bacterial replication rates at levels up to 80% of its MIC [14] and ampicillin is usually thought to be a bactericidal antibiotic [15]. We therefore assume that bacterial replication rates are not affected by ampicillin binding and that ampicillin action is entirely due to an increase in bacterial death rates with successively bound target molecules (Figure 1C & D). We fitted our model parametrized with previously determined experimental data (Table 1) to time-kill curves of *E. coli* exposed to ampicillin (data from [16]) to obtain  $\delta(x)$ . We used the following drug concentrations: 6 mg/l, 48 mg/l, 256 mg/l to fit the model and 0mg/l to estimate  $r_0$ , the maximal growth rate in absence of antibiotics. We used simulated annealing to identify parameters of our model, finding the following optimal set of parameters (Table 1):

| Parameter  | Value                | Units                    | Description         | References             |
|------------|----------------------|--------------------------|---------------------|------------------------|
| $k_f$      | 130                  | $M^{-1} \text{sec}^{-1}$ | Association rate    | [13]                   |
| $k_a$      | $10^{-4}$            | $\text{sec}^{-1}$        | Deacetylation rate  | [13]                   |
| $K_D$      | $7.69 \cdot 10^{-7}$ | M                        | Affinity            | $K_a/k_f$              |
| $r_0$      | $6.22 \cdot 10^{-4}$ | $\text{sec}^{-1}$        | Maximum growth rate | Optimization exp. data |
| $\delta_0$ | $1.9 \cdot 10^{-3}$  | $\text{sec}^{-1}$        | Maximum death rate  | Optimization exp. data |

**Table 1. Ampicillin parameters.**

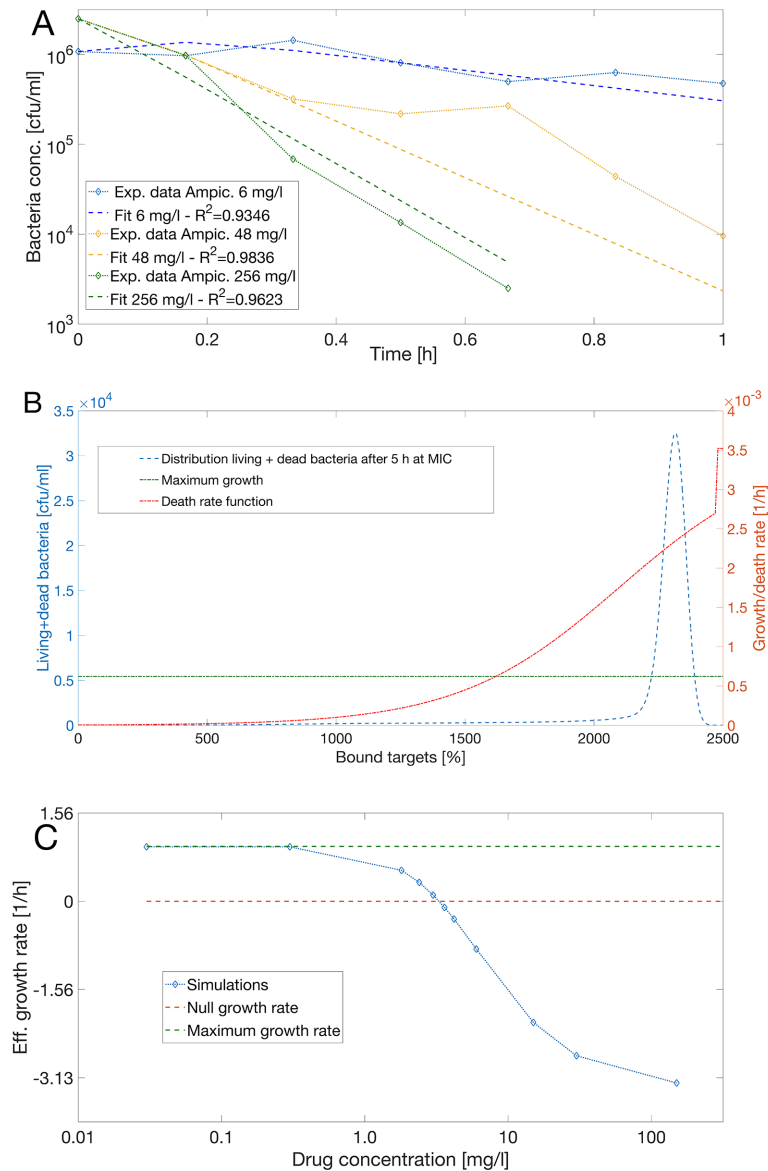

**Figure 2.** **A** shows the fit of our model to experimental data. We were able to obtain an  $R^2 = 0.93$  ( 6 mg/l),  $R^2 = 0.98$  ( 48mg/l) and  $R^2 = 0.96$  ( 256mg/l). We note that our model can replicate the initial growth of the bacterial populations at a concentration slightly above the MIC. **B.** shows how the replication and death rates depend on the amount of bound target in the fitted model, as well as the distribution of target occupancy in the living and dead bacterial population after 5 hours at MIC. **C.** Effective growth rate (1/h scaled  $\log_{10}$ ) for different drug concentrations (blue line) is plotted together with the maximum growth rate of the Ampicillin (green line) and the null growth rate (red line). The intersection between the null growth rate and the blue line is an estimate of the MIC.

The estimated mean occupancy considering both living and dead bacteria is 89%. This value is very close to experimental estimates in *Staphylococcus aureus* (86-99%)[17]. Thus, our model is able to describe bacterial time-kill curves from first principles with measurable parameters of drug-target binding.

We next use our model to predict antibiotic efficacy (as measured by the effective growth rate [1/h] divided  $\log_{10}(e)$  to match the experimental measure of  $\log_{10}$  change per hour) for other concentrations. We find the same characteristic sigmoidal curve for the dependence of effective growth rate on drug concentration that has been described earlier [16]. Once we calibrated the model, we simulated the bacterial growth with different drug concentration as in figure 2C, and the intersection of the blue line (obtained with different drug concentrations) and the null growth line (red line) gives us the MIC equal to 3.32 (mg/l), which is very close to the estimated MIC in [16] of 3.4 [mg/l]. The estimate of the MIC is a linear estimate of the intersection between 3.30 and 3.33 [mg/l]. Our mechanistic model yields accurate estimates for the MIC even when using only three different concentrations above the MIC.

#### *Changing drug-target binding kinetics and effects on antibiotic susceptibility*

We next investigate how changes in physicochemical parameters will affect bacterial susceptibility to antibiotics. To this end, we consider the quinolone ciprofloxacin, which is one of the most commonly used antibiotics. The effect of varying target molecule content has been evaluated experimentally [18], which allows us to investigate resistance mechanisms that affect the target copy number, such as gene duplications. We can also study the effects of changes in drug-target affinity since the antibiotic class of quinolones contains drugs with a very wide range of drug target affinities ( $K_D \sim 10^{-4} - 10^{-7}$ ) with similar molecular size and similar modes of action. However, as (to

our knowledge) for the majority of antibiotics, the exact rates of drug-target binding and unbinding as well as target occupancy at MIC are not known. We therefore first perform a uni-dimensional sensitivity analysis to explore how these unknown parameters will affect the predicted time-kill curves (supplementary material). Surprisingly, we find that the actual rates of drug-target binding,  $k_f$  and  $k_r$  (and not only the relative values, i.e. the affinity  $K_D = k_r / k_f$ ) change antibiotic susceptibility profoundly. The faster the drug binds its target, the fewer bacteria can replicate before the antibiotic is fully active, and therefore the less antibiotic is needed to suppress bacteria (Figure S2). While this finding is exciting and may guide future optimization of antibiotics, antibiotic binding rates are often not known and in these cases it may be difficult to fit our model quantitatively to time-kill curves.

However, our qualitative predictions regarding net growth at varying drug concentrations depending on target molecule content correspond well with experimental data where the target (gyrase) content of bacterial cells was altered by overexpression. We obtain a decreasing MIC for a higher number of targets when assuming that each bacterium can tolerate only a specified number of bound targets.

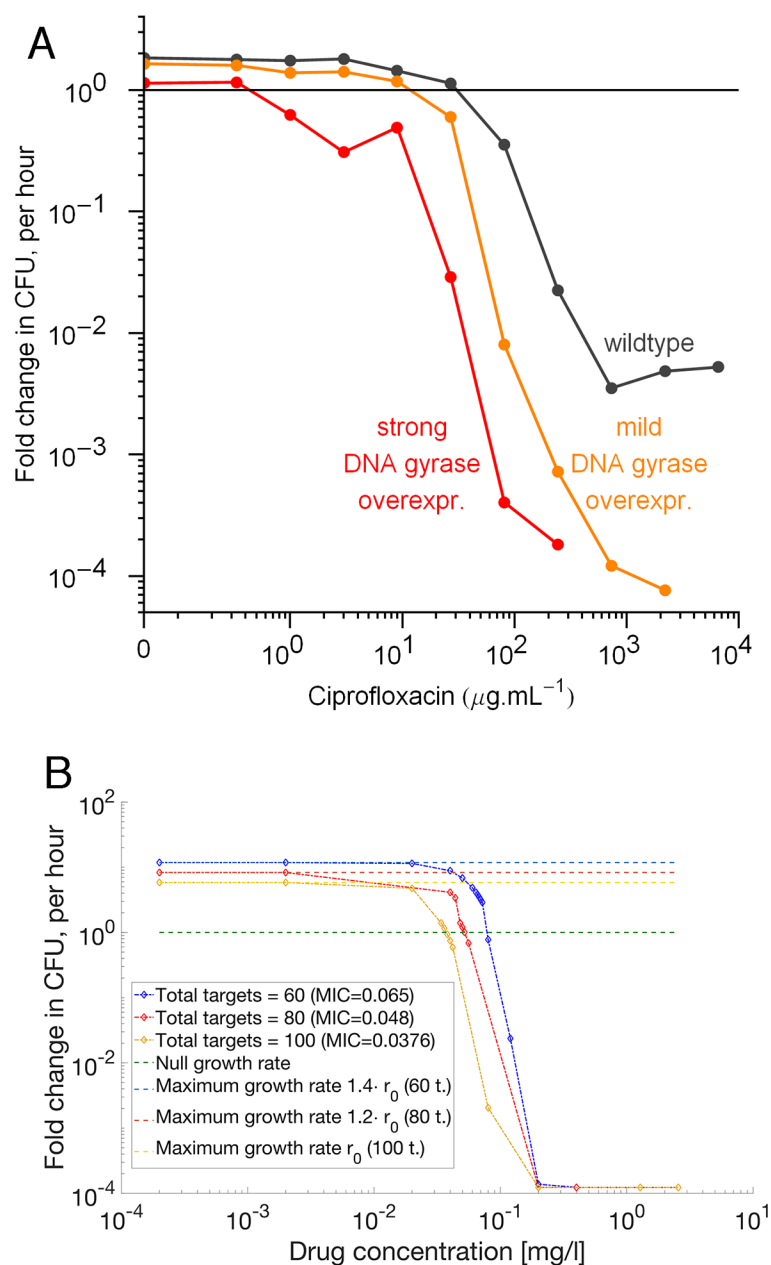

**Figure 3.** Effect of overexpression of target molecule on antibiotic susceptibility. **A.** Three *E. coli* strains with varying target molecule (gyrase) content as described in [18] were exposed to increasing concentrations of the antibiotic ciprofloxacin. The net growth rate at varying drug concentrations was determined by sequentially counting colony forming units on plates after addition of the antibiotic to liquid culture. **B.** Simulations of three strains with 60, 80, 100 targets. To match the experimental findings, we assume there is a fitness cost associated with more targets, i.e. a different maximum growth, as suggested in the experiments illustrated in figure A. Parameters are given in table S1.

### *Estimating the MIC without data on binding rates*

To explore qualitatively how changing drug-target binding kinetics affects the MIC, i.e. the minimal antibiotic concentration at which bacterial growth ceases, we simplify our model. As described above, the distribution of bacteria along the x-axis is due to the velocity  $v = v_f + v_r$  and to the replication rate. Here, we neglect the reproduction of free target molecules due to bacterial replication. Under this approximation, we use a lower drug concentration to inhibit the growth than we really need, because we neglect the reproduction of target molecules due to replication. For this reason, we have an estimate of the lower boundary of the MIC.

The velocity  $v$  is an indicator of the action of the antibiotics. When this action is going to stop (equilibrium between association and dissociation), it means that the velocity is approached to zero.

$$v = \frac{dx}{dt} = \hat{k}_f(\theta - x)A(t) - k_r x.$$

We also know that the number of drug molecules  $A(t)$  has really small variations in time (almost always less than 0.1 %), so we can consider here  $A(t) = A(0)$ , a constant value.

Under these assumptions, we can estimate the value  $x_0$  where the velocity becomes zero, by substituting  $v=0$  in the equation above, obtaining

$$x_0 = \frac{\hat{k}_f \theta A}{(\hat{k}_f A + k_r)}$$

At the MIC the death rate exceeds the growth rate. If we want to inhibit the bacterial growth, we need sufficient drug to exceed  $x_{MIC}$ , the amount of bound target required to reduce bacterial growth to zero under idealized conditions (neglecting replication). This means  $x_0 \geq x_{MIC}$ . For this inequality to hold true,  $C_D$  has to be:

$$C_D \geq K_D \frac{x_{MIC} \mu_f}{\theta - x_{MIC}}$$

where  $\mu_f$  is the molar mass of the drug and  $K_D = k_r/k_f$  is the affinity.

With the sign equal, we have  $C_{below} = K_D \frac{x_{MIC} \mu_f}{\theta - x_{MIC}}$ . This is a lower boundary for the MIC.

Qualitatively, this means that the MIC is linear with  $K_D$  when keeping all other parameters constant. This is consistent with our previous finding when deriving the MIC from drug-target binding alone in a very simplified model [13].

We tested this hypothesis with pooled MICs from clinical enterobacteriaceae isolates collected before the wide-spread use of quinolones in the clinic. Here, we assume that the target molecule, gyrase, is sufficiently conserved in enterobacteriaceae that the relative drug-target affinities of quinolones are similar across these species. We correlate the  $K_D$  of these quinolones (measured in *E. coli*) to the MIC and find that the MIC is indeed proportional to  $K_D$  in 11 enterobacteriaceae species with  $R^2$  between 0.88 and 0.98 (Figure 4).

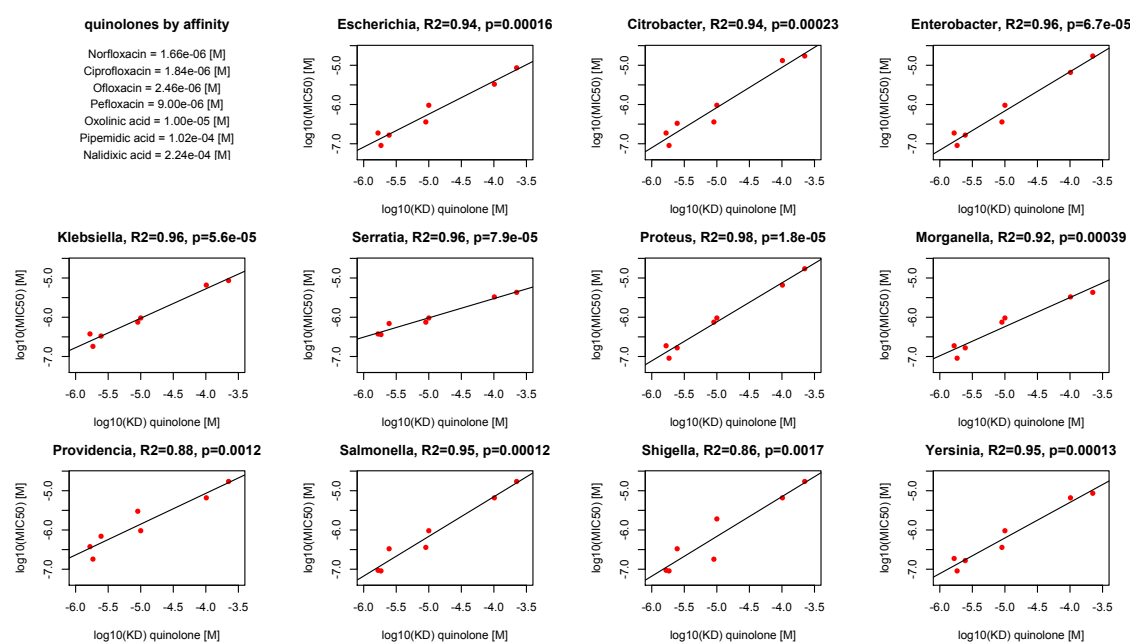

Figure 4: Correlation between  $K_D$  and MIC. MIC data (pooled values from clinical isolates obtained before 1997) were retrieved from [19, 20]. Quinolone-gyrase affinities were obtained from [19-22]. Linear regression was performed with the software package R.

### *Predicting antibiotic concentrations at which resistance is selected*

Finally, our model can be used to explore how the molecular mechanisms of resistance mutations affect antibiotic concentrations at which resistance can emerge, i.e. the resistance selection



window. Here, we return to our fit of the experimental data on ampicillin to determine whether our model reflects the dynamics of a susceptible bacterial population. We compare predicted net growth rates depending on ampicillin concentration between a wild-type strain and an arbitrary resistant strain. We assume here that this resistant strain has a 50-fold slower drug-target binding rate, and the maximum growth rate is the 85% of the maximum growth rate of the wild type. We then predict the antibiotic concentrations at which resistance is selected. In this case, the “competitive resistance selection window”, i.e. the concentration range below the MIC for both strains where the resistant is fitter than the wild type, would start at 0.66 mg/l and end at 3.32 mg/l. The “resistance selection window”, i.e. the concentration range above MIC for the wild-type but below the MIC for the resistant strain, would start at 3.32 mg/l and end at 154.5 mg/l.

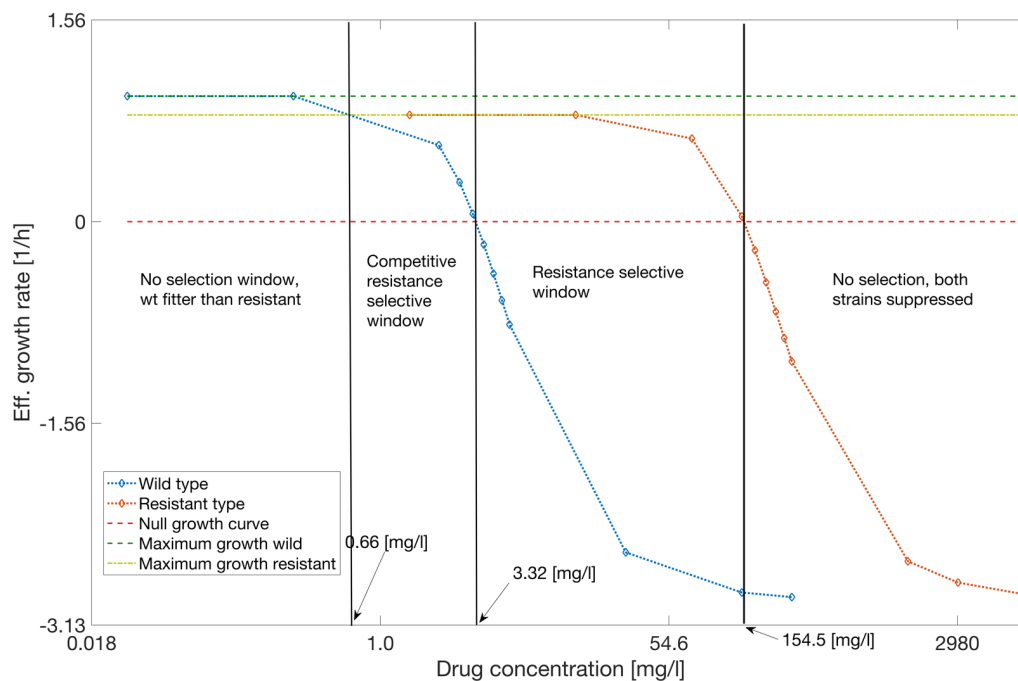

**Figure 5: Resistance selection windows.** Antibiotic concentration windows at which resistance is selected. The blue line is the wild type behavior, the red line is the resistant type. We predict a “competitive resistance selection window” between 0.66 mg/l and 3.32 mg/l. A “resistance selection window” between 3.32 mg/l and 154.5 mg/l. For a concentration, higher than 154.5 mg/l we observe both strains suppressed.

## Discussion

The importance of the MIC of both wild-type and resistant strains in identifying optimal dosing strategies to minimize the risk of resistance is widely appreciated [9]. It is advisable to avoid drug concentrations above the MIC for the wild type but below MIC for the resistant strain because these concentrations allow only the resistant strain to grow. In addition, selection for resistance may also occur below the MIC of the wild type in if antibacterial concentrations are in the so-called “competitive resistance selection window”, where resistant strain may outcompete the wild type [8]. However, we do not know *a priori* how a given resistance mutation affects bacterial growth at a given antibiotic concentration. Here, we present a mathematical model that allows *in silico* predictions of ranges of antibiotic concentrations that should be avoided, and how this range depends on the molecular mechanism of resistance.

To validate our model, we fitted it to three published time-kill curves of *E. coli* exposed to ampicillin. All physicochemical characteristics needed to parametrize our model were determined experimentally for ampicillin. While it was shown experimentally that at MIC, 84-99% of the target molecules are bound, we do not know how bacterial death rates depend on target occupancy. Therefore, we parameterized our model with all other known characteristics and fitted the death rate as a function of occupied target,  $\delta(x)$ , to the data. Our model fits the experimental data very well ( $R^2=0.93-0.98$ ). Our model suggests that the death rate may have a sigmoidal-shaped dependence on target occupancy. This death rate function  $\delta(x)$  predicts that at MIC, 89% of the target is occupied, which is in excellent agreement with the experimental data. We then went on to predict bacterial net growth rates across a wide range of concentrations and predict an MIC of 3.32 [mg/l]. The dataset we worked with was used previously to obtain more accurate MIC estimates than those obtained with classical methods. The previous estimate for the MIC based on 7 time-kill curves was 3.4 [mg/l], which is very close to our estimate even though we used only three time-

kill curves. We therefore conclude that our model is able to describe bacterial time-kill curves quantitatively based on chemical reaction kinetics.

Our next goal was to investigate how different physicochemical characteristics shape bacterial susceptibility depending on antibiotic concentrations. To this end, we performed a uni-dimensional sensitivity analysis. Surprisingly, we find that the binding ( $k_f$ ) and unbinding rates ( $k_r$ ), and not only the binding affinity ( $K_D = k_r / k_f$ ) has a profound effect on bacterial susceptibility. When keeping  $K_D$  constant, drugs that bind more quickly are more effective because they prevent bacterial replication before the target molecules are reproduced. From a bacterial perspective, resistance mutations that slow down drug-target binding are more beneficial than those that speed drug-target dissociation. We then investigated whether our model can reproduce known effects of changes in target molecule content. We used strains overexpressing the target of the antibiotic ciprofloxacin, gyrase, and exposed them to a large range of ciprofloxacin concentrations. As previously shown, bacterial susceptibility increases with increasing target molecule content; our mathematical model is consistent with this finding [18]. This increases our confidence that our model is able to describe antibiotic efficacy when the intracellular reaction kinetics of drug-target binding changes. However, in our experiments we also observe an increased kill rate at very high concentrations of ciprofloxacin. This may be due to increasing DNA damage when ciprofloxacin binds gyrase, a mechanism not explicitly incorporated in our model.

For many antibiotics only the drug-target affinity and not the actual binding rates have been published. While it is difficult to fit our model to time-kill curves in this case, we can simplify the model and make qualitative predictions about expected changes in MIC. Our model predicts that the MIC should be proportional to drug-target affinity. The antibiotic class of quinolones contains drugs with a wide range of drug target affinities ( $K_D \sim 10^{-4} - 10^{-7}$ ) with similar molecular size and similar modes of action, and we hypothesize that the MIC of different quinolones should be

proportional to their gyrase affinity. We verified this hypothesis with data from a meta-analysis on the MICs of various quinolones in clinical enterobacteriaceae isolates collected before the widespread use of quinolones. This means that even in absence of measured binding rates, our model can be employed to understand qualitatively e.g. how much antibiotic to give to prevent resistance mutations that lead to a given change in drug-target affinity. It can also serve as a tool in drug development to predict how much drug-target binding has to be improved to achieve efficacy at a certain antibiotic concentration.

Finally, we demonstrate how our model could be used to predict resistance selection windows, thereby allowing designing drug dosing strategies that avoid exposures to antibiotic concentrations that select for resistance. Our model does not consider host immune responses to infection, which may further modify our expectations regarding treatment success [23-25]. Nevertheless, given the urgent need to preserve the efficacy of existing antibiotics and the need to develop new agents [26], we see a promising role for mechanistic models that can suggest the most promising dosing strategies based on the physicochemical and biochemical characteristics of drug-target interactions. Taken together, our model offers a novel *in silico* platform that may aid in finding antibiotic treatment strategies that minimize the emergence of resistance.

## References

1. zur Wiesch PA, Abel S, Gkatzis S, Ocampo P, Engelstadter J, Hinkley T, et al. Classic reaction kinetics can explain complex patterns of antibiotic action. *Science Translational Medicine*. 2015;7(287). doi: ARTN 287ra73  
10.1126/scitranslmed.aaa8760. PubMed PMID: WOS:000354433900001.
2. Kouyos RD, Metcalf CJ, Birger R, Klein EY, Abel zur Wiesch P, Ankomah P, et al. The path of least resistance: aggressive or moderate treatment? *Proc Biol Sci*. 2014;281(1794):20140566. doi: 10.1098/rspb.2014.0566. PubMed PMID: 25253451; PubMed Central PMCID: PMC4211439.
3. Read AF, Day T, Huijben S. The evolution of drug resistance and the curious orthodoxy of aggressive chemotherapy. *Proc Natl Acad Sci U S A*. 2011;108 Suppl 2:10871-7. doi: 10.1073/pnas.1100299108. PubMed PMID: 21690376; PubMed Central PMCID: PMC3131826.
4. Colijn C, Cohen T. How competition governs whether moderate or aggressive treatment minimizes antibiotic resistance. *Elife*. 2015;4. doi: 10.7554/eLife.10559. PubMed PMID: 26393685; PubMed Central PMCID: PMC4641510.
5. Ehrlich P. Address in Pathology, ON CHEMOTHERAPY: Delivered before the Seventeenth International Congress of Medicine. *Br Med J*. 1913;2(2746):353-9. PubMed PMID: 20766753; PubMed Central PMCID: PMC42345634.
6. Goossens H, Ferech M, Vander Stichele R, Elseviers M, Group EP. Outpatient antibiotic use in Europe and association with resistance: a cross-national database study. *Lancet*. 2005;365(9459):579-87. doi: 10.1016/S0140-6736(05)17907-0. PubMed PMID: 15708101.
7. Drlica K, Zhao X. Mutant selection window hypothesis updated. *Clin Infect Dis*. 2007;44(5):681-8. doi: 10.1086/511642. PubMed PMID: 17278059.
8. Gullberg E, Cao S, Berg OG, Ilback C, Sandegren L, Hughes D, et al. Selection of resistant bacteria at very low antibiotic concentrations. *PLoS Pathog*. 2011;7(7):e1002158. doi: 10.1371/journal.ppat.1002158. PubMed PMID: 21811410; PubMed Central PMCID: PMC3141051.
9. Sime FB, Roberts MS, Peake SL, Lipman J, Roberts JA. Does Beta-lactam Pharmacokinetic Variability in Critically Ill Patients Justify Therapeutic Drug Monitoring? A Systematic Review. *Annals of Intensive Care*. 2012;2(1):35. doi: 10.1186/2110-5820-2-35.
10. Brighty KE, Gootz TD. Chapter 2 - Chemistry and Mechanism of Action of the Quinolone Antibacterials A2 - Andriole, Vincent T. *The Quinolones (Third Edition)*. San Diego: Academic Press; 2000. p. 33-97.
11. Briani M, Natalini R, Russo G. Implicit–explicit numerical schemes for jump–diffusion processes. *Calcolo*. 2007;44(1):33-57. doi: 10.1007/s10092-007-0128-x.
12. Clarelli F, Di Russo C, Natalini R, Ribot M. A fluid dynamics model of the growth of phototrophic biofilms. *J Math Biol*. 2013;66(7):1387-408. doi: 10.1007/s00285-012-0538-5. PubMed PMID: 22562622.
13. Abel Zur Wiesch P, Clarelli F, Cohen T. Using Chemical Reaction Kinetics to Predict Optimal Antibiotic Treatment Strategies. *PLoS Comput Biol*. 2017;13(1):e1005321. doi: 10.1371/journal.pcbi.1005321. PubMed PMID: 28060813; PubMed Central PMCID: PMC5257006.
14. Ocampo PS, Lazar V, Papp B, Arnoldini M, Abel zur Wiesch P, Busa-Fekete R, et al. Antagonism between bacteriostatic and bactericidal antibiotics is prevalent. *Antimicrob Agents Chemother*. 2014;58(8):4573-82. doi: 10.1128/AAC.02463-14. PubMed PMID: 24867991; PubMed Central PMCID: PMC4135978.

15. Pankey GA, Sabath LD. Clinical relevance of bacteriostatic versus bactericidal mechanisms of action in the treatment of Gram-positive bacterial infections. *Clin Infect Dis*. 2004;38(6):864-70. doi: 10.1086/381972. PubMed PMID: 14999632.
16. Regoes RR, Wiuff C, Zappala RM, Garner KN, Baquero F, Levin BR. Pharmacodynamic functions: a multiparameter approach to the design of antibiotic treatment regimens. *Antimicrob Agents Chemother*. 2004;48(10):3670-6. doi: 10.1128/AAC.48.10.3670-3676.2004. PubMed PMID: 15388418; PubMed Central PMCID: PMCPMC521919.
17. Chambers HF, Sachdeva MJ, Hackbarth CJ. Kinetics of penicillin binding to penicillin-binding proteins of *Staphylococcus aureus*. *Biochem J*. 1994;301 ( Pt 1):139-44. PubMed PMID: 8037661; PubMed Central PMCID: PMCPMC1137153.
18. Palmer AC, Kishony R. Opposing effects of target overexpression reveal drug mechanisms. *Nat Commun*. 2014;5:4296. doi: 10.1038/ncomms5296. PubMed PMID: 24980690; PubMed Central PMCID: PMCPMC4408919.
19. Andriole VT. <<The>> quinolones. 3rd ed. San Diego: Academic Press; 2000. XX, 517 S. p.
20. Jungkind DL, American Society for Microbiology Eastern Pennsylvania Branch. Antimicrobial resistance a crisis in health care. New York etc.: Plenum Press; 1995. X, 248 S. p.
21. Shen LL, Mitscher LA, Sharma PN, O'Donnell TJ, Chu DW, Cooper CS, et al. Mechanism of inhibition of DNA gyrase by quinolone antibacterials: a cooperative drug-DNA binding model. *Biochemistry*. 1989;28(9):3886-94. PubMed PMID: 2546585.
22. Shen LL, Pernet AG. Mechanism of inhibition of DNA gyrase by analogues of nalidixic acid: the target of the drugs is DNA. *Proc Natl Acad Sci U S A*. 1985;82(2):307-11. PubMed PMID: 2982149; PubMed Central PMCID: PMCPMC397026.
23. Abdul-Aziz MH, Dulhunty JM, Bellomo R, Lipman J, Roberts JA. Continuous beta-lactam infusion in critically ill patients: the clinical evidence. *Ann Intensive Care*. 2012;2(1):37. Epub 2012/08/18. doi: 10.1186/2110-5820-2-37. PubMed PMID: 22898246; PubMed Central PMCID: PMCPMC3475088.
24. Pienaar E, Dartois V, Linderman JJ, Kirschner DE. In silico evaluation and exploration of antibiotic tuberculosis treatment regimens. *BMC Syst Biol*. 2015;9:79. doi: 10.1186/s12918-015-0221-8. PubMed PMID: 26578235; PubMed Central PMCID: PMCPMC4650854.
25. Cilfone NA, Pienaar E, Thurber GM, Kirschner DE, Linderman JJ. Systems Pharmacology Approach Toward the Design of Inhaled Formulations of Rifampicin and Isoniazid for Treatment of Tuberculosis. *CPT Pharmacometrics Syst Pharmacol*. 2015;4(3):e00022. doi: 10.1002/psp4.22. PubMed PMID: 26225241; PubMed Central PMCID: PMCPMC4394619.
26. zur Wiesch PA, Kouyos R, Engelstadter J, Regoes RR, Bonhoeffer S. Population biological principles of drug-resistance evolution in infectious diseases. *Lancet Infect Dis*. 2011;11(3):236-47. doi: 10.1016/S1473-3099(10)70264-4. PubMed PMID: 21371657.
