1 **Drug-target binding quantitatively predicts optimal antibiotic dose levels**

2

3 *Fabrizio Clarelli<sup>1</sup>, Adam Palmer<sup>2</sup>, Bhupender Singh<sup>1</sup>, Merete Storflor<sup>1</sup>, Silje Lauksund<sup>1</sup>, Ted*  
4 *Cohen<sup>3</sup>, Sören Abel<sup>1,4,#</sup>, Pia Abel zur Wiesch<sup>1,3,#,\*</sup>* [ORCID: [https://orcid.org/0000-0001-9420-](https://orcid.org/0000-0001-9420-9005)  
5 *9005*]

6

7 1. Department of Pharmacy, Faculty of Health Sciences, University of Tromsø, Tromsø,  
8 Norway.

9 2. Laboratory of Systems Pharmacology, Harvard Medical School, Boston, MA, USA.

10 3. Department of Epidemiology of Microbial Diseases, Yale School of Public Health, New  
11 Haven, Connecticut, United States of America.

12 4. Centre for Molecular Medicine Norway, Nordic EMBL Partnership, Oslo, Norway.

13 # Authors contributed equally

14 \* e-mail: [pia.z.wiesch@uit.no](mailto:pia.z.wiesch@uit.no)

15 **Abstract**

16 Combatting antibiotic resistance will require both new antibiotics and strategies to preserve the  
17 effectiveness of existing drugs. Both approaches would benefit from predicting optimal dosing of  
18 antibiotics based on drug-target binding parameters that can be measured early in drug  
19 development and that can change when bacteria become resistant. This would avoid the  
20 currently frequently employed trial-and-error approaches and might reduce the number of  
21 antibiotic candidates that fail late in drug development.

22  
23 Here, we describe a computational model (COMBAT- Computational Model of Bacterial  
24 Antibiotic Target-binding) that leverages accessible biochemical parameters to quantitatively  
25 predict antibiotic dose-response relationships. We validate our model with MICs of a range of  
26 quinolone antibiotics in clinical isolates demonstrating that antibiotic efficacy can be predicted  
27 from drug-target binding ( $R^2 > 0.9$ ). To further challenge our approach, we do not only predict  
28 antibiotic efficacy from biochemical parameters, but also do the reverse: estimate the magnitude  
29 of changes in drug-target binding based on antibiotic dose-response curves. We experimentally  
30 demonstrate that changes in drug-target binding can be predicted from antibiotic dose-response  
31 curves with 92-94 % accuracy by exposing bacteria overexpressing target molecules to  
32 ciprofloxacin. To test the generality of COMBAT, we apply it to a different antibiotic class, the  
33 beta-lactam ampicillin, and can again predict binding parameters from dose-response curves with  
34 90 % accuracy. We then apply COMBAT to predict antibiotic concentrations that can select for  
35 resistance due to novel resistance mutations.

36

37 Our goal here is dual: First, we address a fundamental biological question and demonstrate that  
38 drug-target binding determines bacterial response to antibiotics, although antibiotic action  
39 involves many additional effects downstream of drug-target binding. Second, we create a tool  
40 that can help accelerate drug development by predicting optimal dosing and preserve the efficacy  
41 of existing antibiotics by predicting optimal treatment for possible resistant mutants.

42

### 43 **Introduction**

44 The rise of antibiotic resistance represents an urgent public health threat. In order to effectively  
45 combat the spread of antibiotic resistance, we must optimize the use of existing drugs and  
46 develop new drugs that are effective against drug-resistant strains. Accordingly, methods to  
47 improve antibiotic dose levels to i) maximize efficacy against susceptible strains and ii)  
48 minimize resistance evolution play a key role in our defense against antibiotic resistant  
49 pathogens.

50

51 It is noteworthy that dosing strategies for treatment of susceptible strains (e.g., dosing level[1],  
52 dosing frequency[2], and treatment duration[3-5]) have recently been substantially improved, even  
53 for antibiotic treatments that have been standard of care for decades. This suggests that there  
54 likely remains significant room for optimization in our antibiotic treatment regimens. It also  
55 highlights the difficulty in identifying optimal dosing levels for new antibiotics. Indeed,  
56 optimizing dosing is one of the biggest challenges in drug development. Typically, time-  
57 consuming trial-and-error approaches are used and each failed drug candidate makes this process  
58 more expensive[6].

59

60 It is even more challenging to optimize dose levels to minimize the emergence of antibiotic  
61 resistance, both for existing and novel antibiotics. There remains substantial debate about which  
62 dosing strategies best prevent the emergence of resistant mutants during treatment[7-9]. In this  
63 context, a useful concept that links antibiotic concentrations with resistance evolution is the  
64 resistance selection window (mutant selection window) that ranges from the lowest  
65 concentration at which the resistant strain grows faster than the wild-type, usually well below the  
66 wild-type minimum inhibitory concentration (MIC), to the MIC of the resistant strain[10-12].  
67 Antibiotic concentrations above the resistance selection window safeguard against *de novo*  
68 resistance emergence. Antibiotic concentrations below the resistance selection window do not  
69 kill the susceptible strain, but also do not favor the resistant strain and therefore do not promote  
70 emergence of resistance. The latter may be preferable if one cannot dose above the MIC of the  
71 resistant strain due to toxicity or solubility limits. To limit resistance emergence, it is therefore  
72 important to identify the resistance selection window and optimize dosing accordingly.

73  
74 Limitations in our knowledge of how antibiotic treatment regimens affect bacterial populations  
75 contribute to the need for lengthy and expensive trial-and-error approaches, with the sheer  
76 number of possible dosing regimens making it difficult to identify an optimal regimen. We argue  
77 that this knowledge gap is a major limitation for the improvement of dosing regimens of existing  
78 drugs and a real obstacle for the development of new antibiotics[13, 14].

79  
80 Pharmacodynamic models that can make predictions of bacterial killing and selection on the  
81 basis of drug-target interactions offer new promise to inform rational antibiotic dosing  
82 practices[15]. Recently described models that include drug-target binding have been useful in

83 gaining a better qualitative understanding of complicated drug effects, such as post-antibiotic  
84 effects, inoculum effects, and bacterial persistence[15-18]. However, to speed the development  
85 of new antibiotics or to inform practices which minimize resistance, we require quantitative  
86 predictions for antibiotics or resistant bacterial strains that do not exist yet. Models which permit  
87 quantitative predictions of changes in drug efficacy as a function of modification of antibiotic  
88 molecules (i.e. new drugs) or novel resistance mutations would be invaluable. Such tools would  
89 advance our general mechanistic understanding of antibiotic action, could guide dosing trials of  
90 new drugs, and suggest better dosing of existing drugs.

91  
92 In this report, we describe a mechanistic computational modeling framework (COMBAT-  
93 CComputational Model of Bacterial Antibiotic Target-binding) that allows us to predict drug  
94 effects based solely on accessible biochemical parameters describing drug-target interaction.  
95 These parameters can be determined early in drug development. We use this framework to  
96 investigate how changes in drug target binding, either due to improvements in existing  
97 antibiotics or due to resistance mutations in bacteria, affect antibiotic efficacy. We first show that  
98 COMBAT accurately predicts bacterial susceptibility as a function of drug-target binding and,  
99 conversely, allows inference of these biochemical parameters on the basis of observed patterns of  
100 bacterial growth suppression or killing. We then use COMBAT to predict the susceptibility of  
101 newly arising resistant variants based on the molecular mechanism of resistance and determine  
102 the resistance selection window.

103

## 104 **Results**

### 105 **Quinolone target affinities correlate with antibiotic efficacy**

106 To investigate how biochemical changes in antibiotic action modifies bacterial susceptibility, we  
107 explored how the affinity of antibiotics to their target affects the MIC. We compared the MICs of  
108 quinolones, an antibiotic class in which individual antibiotics have a wide range of affinities to  
109 their target, gyrase ( $K_D \sim 10^{-4} - 10^{-7}$  M) but are of similar molecular sizes and have a similar mode  
110 of action[19]. This choice allowed us to isolate the effects of differences in drug-target affinity  
111 on the MIC.

112  
113 We obtained binding affinities of quinolones to their gyrase target in *Escherichia coli* from  
114 previous studies[20-24]. We then retrieved MIC data for several quinolones from clinical  
115 Enterobacteriaceae isolates collected before 1990[25], i.e., before the widespread emergence of  
116 quinolone resistance[19]. We assume that quinolone affinities obtained from clinical  
117 Enterobacteriaceae isolates collected before the emergence of resistance correspond to those  
118 measured in wild-type *E. coli*.

119  
120 To make qualitative predictions of MICs, we employed a simplified model based on the  
121 assumptions that i) drug-target binding occurs much more quickly than bacterial replication, ii)  
122 the antibiotic concentration remains constant and iii) that during the 18 hours of an MIC assay,  
123 the concentration gradient of the drug inside and outside the cell has equilibrated. Under these  
124 assumptions, the MIC can be expressed as

$$125 \quad MIC = K_D \frac{f_c}{1-f_c} \quad (1)$$

126  
127 where  $K_D$  represents the affinity constant and  $f_c$  the fraction of the target bound at the MIC[26].  
128 Accordingly, this model predicts that the MIC is linearly correlated with  $K_D$ .

129  
130 Fig. 1 shows the correlations between drug-target affinities and MICs for seven quinolones and  
131 clinical isolates of 11 different Enterobacteriaceae species. We observed a significant ( $p < 0.018$ )  
132 linear correlation between MIC and  $K_D$  in all species, confirming the qualitative model  
133 prediction.

134

### 135 **A quantitative model to predict antibiotic efficacy**

136 While it was encouraging that our model can qualitatively predict MIC changes, our aim was to  
137 quantitatively predict antibiotic treatment performance. The simplified model assumes that the  
138 binding kinetics are much faster than bacterial replication, which may not be true in all cases. To  
139 expand the generalizability of the model, we extended the modeling framework to allow that  
140 bacterial replication may occur in a similar time frame as drug-target binding events.

141

142 The full model (COMBAT- COmputational Model of Bacterial Antibiotic Target-binding)  
143 describes the binding and unbinding of antibiotics to their targets and predicts how such binding  
144 dynamics affects bacterial replication and death (Fig. 2a). In previous work linking drug-target  
145 binding kinetics with bacterial replication[18 ], we described a population of bacteria with  $\theta$   
146 target molecules per cell with a system of  $\theta + 1$  (bacteria with 0, 1, ...,  $\theta$  bound target  
147 molecules) ordinary differential equations (ODEs). This system increases in complexity with the  
148 number of target molecules and makes fitting the model to data computationally too demanding  
149 for most settings. To simplify this prior approach, we developed new mathematical models based  
150 on partial differential equations (PDEs), where a single equation describes all bacteria  
151 simultaneously. The sum of bacteria within all target occupancy states over time can be

152 described by a time kill curve (Fig. 2b), during which the bacterial population is characterized by  
 153 the distribution of bacterial cells with different levels of target occupancies at each time-step  
 154 (Fig. 2c). This curve can be visualized as a two-dimensional surface in a three-dimensional  
 155 coordinate system where the number of bacteria is represented on the z-axis, the percent of  
 156 bacteria with the fraction of bound target molecules on the x-axis, and time on the y-axis (Fig.  
 157 2d).

158

159 Antibiotic action is described by rates of binding ( $k_f$ ) and unbinding ( $k_r$ ) to bacterial target  
 160 molecules (Fig. 2a, e). The binding of an antibiotic to a target results in the formation of an  
 161 antibiotic-target molecule complex  $x$ , where  $x$  ranges between 0 and  $\theta$ .

162 COMBAT consists of two mass balance equations: equation 2 describing bacterial numbers as a  
 163 function of bound targets and time and equation 3 describing antibiotic concentration as a  
 164 function of time (Methods section).

$$165 \quad \frac{\partial B(x,t)}{\partial t} + \overbrace{\frac{\partial}{\partial x} (v_B(x,t)B(x,t))}^{\text{Binding kinetics}} = \overbrace{-r(x)B(x,t)F_{lim}(t) + S_B(x,t)F_{lim}(t)}^{\text{Replication and its effects on binding}} - \overbrace{\delta(x)B(x,t)}^{\text{Death}} \quad (2)$$

166

167 The term for binding kinetics is given in brown, the term for replication in blue and the term for  
 168 death in red.

$$169 \quad \frac{dA(t)}{dt} = -\hat{k}_f A(t) \int_0^\theta (\theta - x)B(x,t)dx + k_r \int_0^\theta xB(x,t)dx \quad (3)$$

170

171 where  $v_B = v_f - v_r$ ,  $v_f = \hat{k}_f A(t)(\theta - x)$  and  $v_r = k_r x$ .  $v_B$ ,  $v_f$ , and  $v_r$  can be seen as a  
 172 generalized velocity  $v = \frac{dx}{dt}$ .

173



174 Equation 4 (part of the replication term in equation 2) describes how daughter cells inherit bound  
175 target molecules from the mother cell during replication:

$$176 \quad S_B(x, t) = 2 \int_x^\theta h(x, z)r(z)B(z, t)dz; \quad \forall x \in [0, \theta] \quad (4)$$

177

178 Equation 5 (part of the replication term in equation 2) is a logistic growth model describing  
179 reduced bacterial replication as the carrying capacity is approached:

$$180 \quad F_{lim} = \left( 1 - \frac{\int_0^\theta B(x, t) dx}{K} \right) \quad (5)$$

181

## 182 **Model fit to ciprofloxacin time-kill data**

183 We used the quinolone ciprofloxacin to quantitatively fit bacterial time-kill curves, since this is a  
184 commonly used antibiotic for which binding parameters have been directly measured.

185 Supplementary Tab. S1 gives an overview of the known parameters used for fitting;

186 Supplementary Tab. S2 gives the parameters resulting from our fit.

187

188 The functional relationship between the levels of bacterial replication and death on the fraction  
189 of bound target molecules is extremely hard to obtain experimentally. We therefore treated the  
190 relationships between the fraction of bound target and bacterial replication and death as free  
191 parameters in our model fitting. Ciprofloxacin is considered to have both bacteriostatic and  
192 bactericidal action (mixed action)[27, 28], and we fitted functions for a monotonically decreasing  
193 replication and a monotonically increasing killing with each successively bound target molecule  
194 (see Methods & Supplementary Fig. S1).

195

196 Overall, we found that COMBAT could fit the time-kill curves well ( $R^2 = 0.93$ , Fig. 3a). Fig. 3b  
197 shows the predicted bacterial replication  $r(x)$  and death as a function of target occupancy  $\delta(x)$   
198 based on the fit obtained in Fig. 3a. After model calibration, we simulated bacterial replication  
199 during exposure to different antibiotic concentrations for 18 h. For this simulation, positive  
200 values indicate an increase in the number of bacteria, and negative values indicate a decrease in  
201 the number of bacteria. We estimated a MIC of 0.0139 mg/L (Fig. 3c), a value that is within the  
202 range of MIC determinations for wt *E. coli* (0.01 mg/L, 0.015 mg/L, 0.017 mg/L and 0.023 mg/L  
203 [11, 29-31]).

#### 204 **Accurate prediction of target overexpression from time-kill data**

205 Having shown that COMBAT can quantitatively fit experimental data on antibiotic action within  
206 biologically plausible parameters, we continued to test the predictive ability of the model. Given  
207 our hypothesis that modifications in antibiotic-target interactions lead to predictable changes in  
208 bacterial susceptibility, we experimentally induced changes in the antibiotic-target interaction of  
209 ciprofloxacin in *E. coli*. We then quantified these biochemical changes by fitting COMBAT to  
210 corresponding time-kill curves and compared them to the experimental results. Ciprofloxacin  
211 acts on gyrase A<sub>2</sub>B<sub>2</sub> tetramers[19]. We used an *E. coli* strain for which both gyrase A and gyrase  
212 B are under the control of a single inducible promoter ( $P_{lacZ}$ ), such that the amount of gyrase  
213 A<sub>2</sub>B<sub>2</sub> tetramer can be experimentally manipulated[32]. We measured net growth rates for this  
214 strain at different ciprofloxacin concentrations in the presence of 10  $\mu$ M isopropyl  $\beta$ -D-1-  
215 thiogalactopyranoside (IPTG; mild overexpression) and 100  $\mu$ M IPTG (strong overexpression)  
216 and compared it to the wild-type in the absence of the inducer (Fig. 4a).

217

218 Like previously reported, we find that increasing gyrase content makes *E. coli* more susceptible  
219 to ciprofloxacin[32]. We fitted net growth rates allowing the target molecule content, i.e. gyrase  
220  $A_2B_2$ , to vary. We assumed that the only change between the different conditions was the amount  
221 of target. We further assumed that the relationship between bound target and bacterial replication  
222 or death did not differ between the control strain containing a mock plasmid (no IPTG) and the  
223 experiments with overexpression (Fig. 4b, between 0 % and 100 %). Finally, we assumed that  
224 the maximal kill rate at very high antibiotic concentrations was accurately measured in our  
225 experiments and forced the function describing bacterial death through the measured value when  
226 all target molecules are bound. We found the best fit for a 1.31x increase in GyrA<sub>2</sub>B<sub>2</sub> target  
227 molecule content for bacteria grown in the presence of 10 μM IPTG and a 2.02x increase in  
228 GyrA<sub>2</sub>B<sub>2</sub> target molecule content for those grown in the presence of 100 μM IPTG.

229  
230 We subsequently tested these predictions experimentally by analyzing Gyrase A and B content  
231 by western blot (Fig. 4c; Supplementary Fig. S2). Using realistic association and dissociation  
232 rates for biological complexes[33], we predicted a range of functional tetramers based on the  
233 relative amount of Gyrase A and B proteins (Fig. 4d). Supplementary Tab. S3 details the  
234 individual measurements, and the procedure to estimate tetramers is provided in the methods  
235 section. We found that the observed overexpression was very close to our theoretical prediction,  
236 with 1.43x [95 % CI 1.19-1.81] overexpression (model prediction = 1.31x overexpression) in the  
237 presence of 10 μM IPTG and 2.15x [95 % CI 1.73-2.87] overexpression in the presence of  
238 100 μM IPTG (model prediction = 2.02x overexpression).

239

240 **Accurate prediction of target occupancy at MIC from time-kill data**

241 Next, we tested whether COMBAT can be applied to the action of the beta-lactam ampicillin, a  
242 very different antibiotic with a distinct mode of action from quinolones. Using published  
243 pharmacodynamic data of *E. coli* exposed to ampicillin[31] also allowed us to compare  
244 COMBAT predictions to established pharmacodynamic approaches. Most of the biochemical  
245 parameters for ampicillin binding to its target, penicillin-binding proteins (PBPs), have been  
246 determined experimentally (Supplementary Tab. S1). Ampicillin is believed to act as a  
247 bactericidal drug[34], and this mode of action is supported by findings from single-cell  
248 microscopy[26]. We therefore assume that ampicillin binding does not affect bacterial  
249 replication. In order to model the consumption of beta-lactams at target inhibition and eventual  
250 target recovery, we made small adjustments to equation 13 (see Methods, description of beta-  
251 lactam action).

252  
253 We fitted COMBAT to published time-kill curves of *E. coli* exposed to ampicillin (Fig. 5a).  
254 Again, COMBAT provides a good fit to the experimental data between 0 min and 40-60 min.  
255 After that time, observed bacterial killing showed a characteristic slowdown at high ampicillin  
256 concentrations which is often attributed to persistence[18] (Fig. 5a). For the sake of simplicity,  
257 we chose to omit bacterial population heterogeneity in this work and therefore cannot describe  
258 persistence, even though COMBAT can be adapted to capture this phenomenon[18]. Because  
259 ampicillin acts in an entirely bactericidal manner, we assume a constant replication rate (see  
260 Methods & Supplementary Fig. S1) and fitted bacterial death as a function of target binding,  
261  $\delta(x)$  (Fig. 5b, fitted parameters in Tab. S4). Fig. 5c shows the predicted net growth rate over a  
262 range of drug concentrations. We estimated a MIC of 2.6 mg/L. This MIC is based on the  
263 Clinical & Laboratory Standards Institute definition of the MIC determined at 18 h. The original

264 source of the MIC, which was based on experimental data and a pharmacodynamic model[31]  
265 determined an MIC of 3.4 mg/L at 1 h. If we change our prediction to 1 h, our estimated MIC is  
266 3.32 mg/L, which is within 2.5 % of the reported value[31].

267  
268 Having established that COMBAT can also adequately capture the pharmacodynamics of  
269 ampicillin, we next tested whether we can estimate experimentally determined target occupancy  
270 at the MIC. Our estimated mean occupancy considering both living and dead bacteria is 89 %  
271 (Fig. 5b), a value within previously reported experimental estimates from *Staphylococcus aureus*  
272 (84-99 %)[35].

273

#### 274 **Sensitivity of antibiotic efficacy to parameters of drug-target binding**

275 It is possible to vary all parameters in COMBAT and explore their effect. We used this to test  
276 how hypothetical chemical changes to ampicillin or ciprofloxacin would affect antibiotic  
277 efficacy (Supplementary Fig. S3-S11). These changes could reflect either bacterial resistance  
278 mutations or modifications of the antibiotics themselves. We predict that changes in drug-target  
279 affinity,  $K_D$ , have more profound effects than changes in target molecule content, bacterial  
280 reaction to increasingly bound target (i.e.  $\delta(x)$  and  $r(x)$ ), or changes in target molecule content.  
281 We also predict that the individual binding rates  $k_r$  and  $k_f$ , and not just the ratio of these terms,  
282 the  $K_D$ , are important factors in efficiency. The faster a drug binds, the more efficient we  
283 predicted it will be. One intuitive explanation for the observation that  $k_f$  drives efficacy is that a  
284 slow binding fails to rapidly interfere with bacterial replication, which may allow for the  
285 production of additional target molecules and thereby reduce the ratio of free antibiotic to target  
286 molecules.

287

## 288 **Forecasting the resistance selection window**

289 Finally, we illustrate how COMBAT can be used to explore how the molecular mechanisms of  
290 resistance mutations affect antibiotic concentrations at which resistance can emerge, i.e., the  
291 resistance selection window. We compared predicted net growth rates as a function of  
292 ciprofloxacin concentrations for a wild-type strain and an archetypal resistant strain. For this  
293 analysis, we assumed that the resistant strain has a 100x slower drug-target binding rate (i.e.  
294 ~100x increased MIC, realistic for novel point mutations[36]) and that the maximum replication  
295 rate of the resistant strain is 85 % of the wild type strain[37]. We then predicted the antibiotic  
296 concentrations at which resistance would be selected. Interestingly, when comparing COMBAT  
297 to previous pharmacodynamics models (Fig. 5), we observed that estimates of replication rates  
298 depend on the selected time frame (Fig. 6a). When the timeframe for MIC determination is set to  
299 18 h as defined by CLSI[38], the “competitive resistance selection window”, i.e., the  
300 concentration range below the MIC of both strains where the resistant strain is fitter than the wild  
301 type, ranges from 0.002 mg/L to 0.014 mg/L for ciprofloxacin (Fig. 6a) and 1 mg/L to 2.6 mg/L  
302 for ampicillin (Supplementary Fig. S12), respectively. This corresponds well with previous  
303 observations that ciprofloxacin resistance is selected for well below MIC[11]. However, when  
304 measuring after 15 min or 45 min, the results are substantially different. The reason for this is  
305 illustrated in Fig. 6b. COMBAT reproduces non-linear time kill curves where bacterial  
306 replication continues until sufficient target is bound to result in a negative net growth rate. This  
307 compares well with experimental data around MIC in Fig. 3a and 5a. In Fig. 6b, we show model  
308 predictions for ciprofloxacin concentrations corresponding to a zero net growth (i.e. same  
309 population size) after 15 min, 45 min and 18 h ( $MIC_{Resistant; 15 \text{ min}}$ ,  $MIC_{Resistant; 45 \text{ min}}$ ,

310 MIC<sub>Resistant; 18 h</sub>). In all cases, the bacterial population first increases and then decreases slowly.  
311 This may have consequences for the selection of resistant strains. Fig. 6c illustrates how the  
312 resistance selection windows depending on the observed time frame. This suggests that even at  
313 concentrations above the 18 h MIC of the resistant strain, there may be initial growth of the  
314 resistant strain. In this case, the resistant strain could continue growing at concentration of up to  
315 7 mg/L ciprofloxacin at 15 min, even though the MIC at 18 h is 1.27 mg/L.

316

### 317 **Discussion**

318 Optimizing dosing levels of antibiotics is important for maximizing drug efficacy against wild-  
319 type strains as well as for minimizing the rise of resistant mutants. The determination of optimal  
320 dosing strategies typically requires expensive empirical studies; the need for such studies arises  
321 in part from our currently limited capacity to predict how antibiotics will affect bacteria at a  
322 given concentration. In fact, drug attrition is mainly due to insufficient predictions of efficacy  
323 (pharmacodynamics) rather than pharmacokinetics[6]. For optimizing drug development and for  
324 minimizing resistance, we need quantitative predictions for antibiotics or resistant bacterial  
325 strains that do not exist yet. The ability to accurately predict MICs on the basis of biochemical  
326 parameters and, more generally, to define antibacterial activity across a range of drug  
327 concentrations, would allow us to estimate antibiotic efficacy for novel compounds or against not  
328 yet emerged resistant strains[15, 39]. Recent studies have reported methods to predict MICs from  
329 whole genome sequencing data[40, 41]. However, these methods require transfer of prior  
330 knowledge on how the resistance mutations affect MICs in other organisms. There are no  
331 methods that could predict *a priori* how chemical changes to an antibiotic structure or novel  
332 resistance mutations affect bacterial growth at a given antibiotic concentration.

333

334 Here, we accurately predict antibiotic action on the basis of accessible biochemical parameters of  
335 drug-target interaction. Our computational model, COMBAT provides a framework to predict  
336 the efficacy of compounds based on drug-target affinity, target number, and target occupancy.  
337 These parameters may change both when improving antibiotic lead structures as well as when  
338 bacteria evolve resistance. Importantly, they can be measured early in drug development and  
339 may even be a by-product of target-based drug discovery[42]. When these data are available,  
340 COMBAT makes only one assumption: that the rate of bacterial replication decreases and/or the  
341 rate of killing increases with successive target binding. While fitting, we allow this relationship  
342 to be gradual or abrupt and select the best fit. This means we do not model specific molecular  
343 mechanisms down-stream of drug-target binding, but their effects are subsumed in the functions  
344 that connect the kinetic of drug-target binding to bacterial replication and death.

345  
346 In previous work, for example on antipsychotics[16], antivirals[17] and antibiotics[15, 18],  
347 models of drug-target binding kinetics have been used to improve our qualitative understanding  
348 of pharmacodynamics. Our study substantially advances this work by making accurate  
349 quantitative predictions across antibiotics and bacterial strains when measurable biochemical  
350 characteristics change. This is possible because COMBAT employs an elegant mathematical  
351 approach, based on partial differential equations, that makes it computationally feasible to fit the  
352 model to a large range of data. Importantly, we are not only able to predict antibiotic action from  
353 biochemical parameters, but can also vice versa use COMBAT to accurately predict biochemical  
354 changes from observed patterns of antibiotic action. We have confirmed the excellent predictive  
355 power of COMBAT with clinical data as well as experiments with antibiotics with very different  
356 mechanisms of action. This gives us confidence that biochemical parameters are major



357 determinants of antibiotic action in bacteria and that COMBAT helps to make rational decisions  
358 about antibiotic dosing.

359

360 In drug development, our mechanistic modeling approach provides insight into which chemical  
361 characteristics of drugs may be useful targets for modification. For example, our sensitivity  
362 analyses indicate that antibiotics with a similar affinity but faster binding inactivate bacteria  
363 more quickly and therefore prevent replication and production of more target molecules, which  
364 would change the ratio of antibiotic to target. Furthermore, because e.g. antibiotic binding and  
365 unbinding rates can be determined early in the drug development process, such insight can help  
366 the transition to preclinical and clinical dosing trials. This may contribute to reducing bottlenecks  
367 between these phases of drug development and thereby save money and time.

368

369 Avoiding antibiotic concentrations that select for resistance is challenging because the precise  
370 concentrations are only known after extensive experiments have been performed that identify the  
371 MIC of (nearly) all possibly emerging resistant mutants. Predicting the resistance selection  
372 windows of novel resistant mutants on the basis of biologically plausible changes in drug-target  
373 binding would allow us to better assess what drug concentrations need to be achieved to avoid  
374 selection of resistance. This approach offers new promise to assess resistance risks prior to  
375 characterizing the majority of resistance mutations and thereby reduce the failure rates of  
376 candidate compounds late in the drug development process when resistance is observed in  
377 patients and substantial resources have been invested.

378

379 Our approach also offers insight into determinants of the resistance selection window. Rather  
380 than determining the resistance selection window for a comprehensive collection of possibly  
381 arising resistance mutations in each bacteria-drug pair, it would be attractive to build  
382 transferrable knowledge that allows estimating the resistance selection window. In concordance  
383 with a recent meta-analysis of experimental data[43], our sensitivity analyses predict that  
384 changes in drug target binding and unbinding have a greater impact on the MIC than changes in  
385 target molecule content or down-stream processes. Thus, a more comprehensive characterization  
386 of the binding parameters of spontaneous resistant mutants would allow an overview of the  
387 maximal biologically plausible levels of resistance that can arise with one mutation. Dosing  
388 above this level should then safeguard against resistance. This is especially useful for compounds  
389 for which it is difficult to saturate the mutational target for resistance, or for safeguarding against  
390 resistance to newly introduced antibiotics for which we do not yet have a good overview of  
391 resistance conferring mutations. If toxicity, solubility or other constraints do not allow dosing  
392 above the MIC of expected resistant strains, COMBAT can predict the concentration range at  
393 which resistance is less strongly selected. This could guide decisions on treating with low versus  
394 high doses, which is currently controversially debated[7, 8]. Good quantitative estimates on the  
395 dose-response relationship of new drugs would also help defining the therapeutic window, i.e.  
396 the range of drug concentrations at which the drug is effective but not yet toxic.

397

398 Our quantitative work can help to identify optimal dosing strategies at constant antibiotic  
399 concentrations for homogeneous bacterial populations. These measures are commonly used to  
400 assess antibiotic efficacy. In addition, previous work has demonstrated that drug-target binding  
401 models can qualitatively describe antibiotic efficacy over the fluctuating concentrations that

402 actually occur in patients[26, 44]. They can also explain complicated phenomena such as  
403 biphasic kill curves, the post-antibiotic effect, or the inoculum effect[15, 18, 45] that often  
404 complicate the clinical phase of drug development. COMBAT has similar characteristics that  
405 allow capturing these complex phenomena. Therefore, employing COMBAT may be useful for  
406 guiding drug development to maximize antibiotic efficacy and minimize *de novo* resistance  
407 evolution.

408

## 409 **Methods**

### 410 *Mathematical model*

411 COMBAT incorporates the binding and unbinding of antibiotics to their targets and describes  
412 how target binding affects bacterial replication and death. This work extends the model  
413 developed in[18]. COMBAT consists of a system of two mass balance equations: one PDE for  
414 bacteria (describing replication and death as a function of both time and target binding) and one  
415 ODE for antibiotic molecules (describing the concentrations as function of time).

416

417 In the most basic version of COMBAT, we ignored differences between extracellular and  
418 intracellular antibiotic concentrations and only followed the total antibiotic concentration  $A$ ,  
419 assuming that the time needed for drug molecules to enter bacterial cells is negligible. We model  
420 ciprofloxacin (to which there is a limited diffusion barrier[46]) and ampicillin (where the target  
421 is not in the cytosol, even though the external membrane in gram negatives has to be crossed to  
422 reach PBPs). We therefore believe that this assumption is justified in wild-type *E. coli*. This  
423 basic version of COMBAT is therefore more accurate for describing antibiotic action where the  
424 diffusion barrier to the target is weak.

425

426 *Binding kinetics*

427 We describe the action of antibiotics as a binding and unbinding process to bacterial target  
 428 molecules[18]. For simplicity, we assume a constant number of available target molecules  $\theta$ . The  
 429 binding process is defined by the formula  $A + T \rightleftharpoons x$ , where the intracellular antibiotic  
 430 molecules  $A$  react with target molecules  $T$  at a rate  $k_f$  and form an antibiotic-target molecule  
 431 complex  $x$ , where values for  $x$  range between 0 and  $\theta$ . If the reaction is reversible, the complex  
 432 dissociates with a rate  $k_r$ .

433 In[18], the association and dissociation terms are described by the following terms

$$\begin{aligned}
 435 \quad \frac{dB_i(t)}{dt} = & \overbrace{\widehat{k}_f A(t) \left( (\theta - i + 1) B_{i-1}(t) - (\theta - i) B_i(t) \right)}^{\text{Association term}} - \\
 & \overbrace{k_r \left( i B_i(t) - (i + 1) B_{i+1}(t) \right)}^{\text{Dissociation term}}; \quad i \in [0, \theta] \quad (6)
 \end{aligned}$$

436

437 where  $\widehat{k}_f = \frac{k_f}{V_{tot} n_A}$ ,  $k_f$  is the association rate,  $V_{tot}$  is the volume in which the experiment is  
 438 performed,  $n_A$  is Avogadro's number,  $k_r$  is the dissociation rate,  $B_i$  is the number of bacteria with  
 439  $i$  bound targets, and  $\theta$  is the total number of targets. Green denotes the association term, while  
 440 the dissociation term is in orange.

441 This approach requires the use of a large number of ordinary differential equations,  $(\theta + 1)$  for  
 442 the bacterial population and one for the antibiotic concentration. To generalize this approach, we  
 443 assume that the variable of bound targets is a real number  $x \in \mathcal{R}$ . Under this continuity  
 444 assumption, we consider the bacterial cells as a function of  $x$  and the time  $t$ , thereby reducing the  
 445 total number of equations to two.

446 Under the continuity approximation ( $x \in \mathcal{R}$ ), we can rewrite the binding kinetics in the form

$$447 \quad \frac{\partial B(x,t)}{\partial t} = \overbrace{\frac{\partial}{\partial x} \left( \hat{k}_f A(t)(\theta - x)B(x,t) \right)}^{\text{Association term}} - \overbrace{\frac{\partial}{\partial x} (k_r x B(x,t))}^{\text{Dissociation term}} \quad (7)$$

448

449 or simply

$$450 \quad \frac{\partial B(x,t)}{\partial t} = \frac{\partial}{\partial x} \left( v_f(x,t)B(x,t) - v_r(x,t)B(x,t) \right) \quad (8)$$

451

452 where  $v_f = \hat{k}_f A(t)(\theta - x)$  and  $v_r = k_r x$  can be considered as two velocities, i.e., the derivative

453 of the bound targets with respect to the time  $\frac{dx}{dt}$ . Green denotes the association term, while the

454 dissociation term is in orange.

455

456 *Replication rate*

457 We assume that the replication rate of bacteria,  $r(x)$ , is dependent on the number of bound target

458 molecules  $x$ . The function  $r(x)$  is a monotonically decreasing function of  $x$ , such that fewer

459 bacteria replicate as more target is bound.  $r(0)$  is the maximum replication rate, corresponding to

460 the replication rate of bacteria in absence of antibiotics. Thus,  $r(x)$  describes the bacteriostatic

461 action of the antibiotics, i.e., the effect of the antibiotic on bacterial replication.

462

463 *Carrying capacity*

464 Replication ceases as the total bacterial population approaches the carrying capacity  $K$ . At that

465 point, the replication term of the equation is

$$466 \quad \frac{\partial B(x,t)}{\partial t} = r(x)B(x,t) \frac{K - \int_0^\theta B(x,t) dx}{K} = r(x)B(x,t)F_{lim} \quad (9)$$

467

468 where  $F_{lim} = \frac{K - \int_0^\theta B(x,t) dx}{K}$  is the replication-limiting term due to the carrying capacity  $K$ , and

469  $0 \leq F_{lim} \leq 1$ .

470

471 *Distribution of target molecules upon division*

472 We assume that the total number of target molecules doubles at replication, such that each  
473 daughter cell has the same number as the mother cell. We also assume that the total number of  
474 drug-target complexes is preserved in the replication and that the distribution of  $x$  bound target  
475 molecules of the mother cell to its progeny is described by a hypergeometric sampling of  $n$   
476 molecules from  $x$  bound and  $2\theta - x$  unbound molecules. Under the continuity assumption, we  
477 generalize the concept of hypergeometric distribution. Because the hypergeometric distribution  
478 is a function of combinations and because a combination is defined as function of factorials, we  
479 can use  $\Gamma$  functions in place of factorials and redefine a continuous hypergeometric distribution  
480 as a function of  $\Gamma$  functions. A  $\Gamma$  function is

481 
$$\Gamma(\zeta) = \int_0^\infty x^{\zeta-1} e^{-x} dx; \text{Re}(\zeta) > 0 \tag{10}$$

482

483 where  $\zeta$  is a complex number. In this way, the distribution can be expressed as a probability  
484 density function of continuous variables. The amount of newborn bacteria is given by the term  
485  $r(x)B(x,t)F_{lim}(t)$ . We assume that bound target molecules are distributed randomly between  
486 mother and daughter cells, with each of them inheriting 50% upon division on average. This  
487 means that twice the amount of newborn cells must be redistributed along  $x$  to account for the  
488 random distribution process. For example, if a mother cell with 4 bound targets divides, we have  
489 two daughter cells, each with a number of bound targets between 0 and 4 (their sum has to be 4),  
490 following the generalized hypergeometric distribution. For simplicity, we define  $S(x,t)$  to be a

491 function related to the replication rate that depends on the number of bacteria with a number of  
492 bound target molecules ranging between  $x$  and  $\theta$ , their specific replication rate  $r(x)$ , and the  
493 fraction of their daughter cells expected to inherit  $x$  antibiotic-target complexes  $h(x,z)$ :

$$494 \quad S(x, t) = 2 \int_x^\theta h(x, z)r(z)B(z, t) dz \quad (11)$$

495

#### 496 *Death rate*

497 The death rate function  $\delta(x)$  depends on the number of bound target molecules. The function  
498  $\delta(x)$  is assumed to be a monotonically increasing function of  $x$ , where  $\delta(\theta)$  is the maximum  
499 death rate, when all targets in the bacteria have been bound by antibiotics. The shape of this  
500 function describes the bactericidal action of the antibiotic.

501

#### 502 *Bacteriostatic and bactericidal effects*

503 We consider several potential functional forms of the relationship between the percentage of  
504 bound targets and replication and death rates, because the exact mechanisms how target  
505 occupancy affects bacteria is unknown (Supplementary Fig. S1). We use a sigmoidal function  
506 that can cover cases ranging from a linear relationship to a step function. When the inflection  
507 point of a sigmoidal function is at 0 % or 100 % target occupancy, the relationship can also be  
508 described by an exponential function. We assume that replication in bactericidal and death in  
509 bacteriostatic drugs is independent of the amount of bound target. With sufficient experimental  
510 data, the replication rate  $r(x)$  and/or the death rate  $\delta(x)$  can be obtained by fitting COMBAT to  
511 time-kill curves of bacterial populations after antibiotic exposure. The sigmoidal shape of  $r(x)$   
512 and  $\delta(x)$  can be written as:

$$513 \quad r(x) = \frac{r_0}{1+e^{\gamma r(x-x_{rt}h)}}; \delta(x) = \frac{d_{max}}{1+e^{-\gamma d(x-x_{at}h)}} \quad (12)$$

514

515 where  $x_{rth}$  is the replication rate threshold,  $x_{dth}$  is the death rate threshold, and both represent the  
516 point where the sigmoidal function reaches  $\frac{1}{2}$  of its maximum.  $\gamma_r$  and  $\gamma_d$  represent the shape  
517 parameters of the replication and death rate functions, respectively. These factors determine the  
518 steepness around the inflection point. When they are extreme, the relationship approaches a  
519 linear or a step function.

520

521 *Full equation describing bacterial population*

522 Putting these components together, the full equation describing a bacterial population is:

$$\begin{aligned} 523 \quad \frac{\partial B(x,t)}{\partial t} + \overbrace{\frac{\partial}{\partial x} \left( v_f(x,t)B(x,t) - v_r(x,t)B(x,t) \right)}^{\text{Binding kinetics}} = \\ 524 \quad \underbrace{-r(x)B(x,t)F_{lim}(t) + S_B(x,t)F_{lim}(t)}_{\text{Replication and its effects on binding}} - \underbrace{\delta(x)B(x,t)}_{\text{Death}} \end{aligned} \quad (13)$$

525

526 where  $B(x,t)$  is the number of bacteria. As in equations 2, 6, 7 and 8, green denotes the binding  
527 term, orange the unbinding term (together the binding kinetics is given in brown), blue the term  
528 describing bacterial replication and red the term describing bacterial death.

529

530 *Equation describing antibiotic concentration*

531 The free antibiotic concentration results from mass conservation, i.e., all antibiotic molecules  
532 associating with their target are subtracted and all dissociating antibiotic molecules are added.  
533 Equation 3 in the results section describes the dynamics of the antibiotic concentration.

534

535 *Description of beta-lactam action*



536 Beta-lactams acetylate their target molecules (PBPs) and thereby inhibit cell wall synthesis. The  
537 acetylation of PBPs consumes beta-lactams. However, PBPs can recover through deacetylation.  
538 We modified the term of drug-target dissociation in the equation describing antibiotic  
539 concentrations (equation 3), and set the unbinding rate  $k_r = 0$ . To reflect the recovery of target  
540 molecules, we substituted the dissociation rate  $k_r$  in the equation describing the bacterial  
541 population with the deacetylation rate  $k_a$ , as described in[26].

542

#### 543 *Initial and boundary conditions*

544 At  $t = 0$ , we assume that all bacteria have zero bound targets ( $x = 0$ ), and the initial  
545 concentration of bacteria is  $B(x, 0) = 0, x > 0$ , and  $B(0,0) = B_0$ .

546 At the boundaries of the partial differential equation ( $x = 0, x = \theta$ ), we specify that the outgoing  
547 velocities are zero. For  $x = 0$ , i.e. no bound target molecules, the unbinding velocity  $v_r(0, t) =$   
548  $0$ , and in  $x = \theta$ , i.e. all targets are bound, the binding velocity  $v_f(\theta, t) = 0$ . When the  
549 replication term at  $x = 0$  and the death term at  $x = \theta$  are known, we can solve the partial  
550 differential equation with two ordinary differential equations at the boundaries. They are similar  
551 to the equations at  $x = 0$  and at  $x = \theta$  described by Abel zur Wiesch et al.[18], but taking into  
552 account that  $x$  is a continuous variable instead of a natural number.

553

#### 554 *Numerical schemes*

555 To solve our system of differential equations, we used a first-order upwind scheme. Specifically,  
556 we used the spatial approximation  $u_-^f = \frac{u(i)-u(i-1)}{\Delta x}$  for the binding term ( $v_f > 0$ ) and the spatial  
557 approximation  $u_+^f = \frac{u(i+1)-u(i)}{\Delta x}$  for the unbinding term ( $v_r < 0$ ). For the time approximation of

558 both the PDEs and the ODEs, we used the forward approximation  $\frac{\Delta B}{\Delta t} = \frac{B^{n+1} - B^n}{\Delta t}$ [47]. We also  
 559 verified that the Courant-Friedrichs-Lewy condition is satisfied. For fitting the experimental data  
 560 of bacteria exposed to ciprofloxacin and ampicillin, we used the particle swarm method  
 561 (“particleswarm” function in Matlab, MathWorks software).

562

563 *Concentrations of gyrase A<sub>2</sub>B<sub>2</sub> tetramers*

564 We assumed that gyrases A and B first homo-dimerize to A<sub>2</sub> and B<sub>2</sub>, respectively, which in turn  
 565 bind to each other to form the tetramer TR[48]. The following system of equations describes  
 566 their binding kinetics:

$$567 \begin{cases} \frac{dA}{dt} = -2k_1A^2 + 2k_{-1}A_2 \\ \frac{dB}{dt} = -2k_2B^2 + 2k_{-2}B_2 \\ \frac{dA_2}{dx} = k_1A^2 - k_{-1}A_2 - k_3A_2B_2 + k_{-3}TR \\ \frac{dB_2}{dt} = k_2B^2 - k_{-2}B_2 - k_3A_2B_2 + k_{-3}TR \\ \frac{dTR}{dt} = k_3A_2B_2 - k_{-3}TR \end{cases} \quad (14)$$

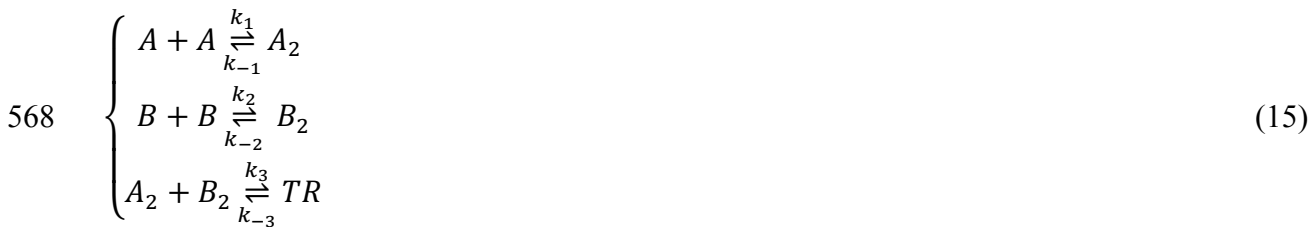

569

570 First, we calibrated the model to ensure that we obtain the correct number of gyrase A<sub>2</sub>B<sub>2</sub>  
 571 tetramers (~100) per wild type bacterial cell[49, 50]. This results in an average of each 206  
 572 gyrase A and B monomers. Because the association and dissociation rates of the dimers and  
 573 tetramers are unknown, we sampled 10<sup>4</sup> sets of six parameters in equation 14 ( $k_{-3}, \dots, k_3$ ) in a  
 574 Latin hypercube approach from a biologically plausible range where the association rates are

575 between  $10^7 - 10^9 \text{ M}^{-1} \text{ s}^{-1}$  and the dissociation rates between  $10^{-3} - 10^{-1} \text{ s}^{-1}$  [33]. This results in  $10^4$   
576 estimates for each of the six experimental replicates quantifying gyrase A and B (Fig. 4,  
577 Supplementary Fig. S2, Supplementary Tab. S3).

578

## 579 ***Experimental methods***

### 580 *Strains, growth conditions and strain construction*

581 *Escherichia coli* strain BW25113[51] (SoA2740) was transformed with plasmids pCA24N-  
582 SC101-gyrAB[32] and pCA24N-SC101- $\Delta$ P-YFP[32] using electroporation, resulting in strains  
583 BW25113/pCA24N-SC101-gyrAB (SoA3329) and BW25113/pCA24N-SC101- $\Delta$ P-YFP  
584 (SoA3330), respectively. pCA24N-SC101-gyrAB encodes the *E. coli gyrAB* genes under control  
585 of the IPTG inducible LacZ promoter. pCA24N-SC101- $\Delta$ P-YFP encodes a promoterless copy of  
586 YFP and was used as a control. Bacteria were grown at 30°C on either LB agar or in LB broth,  
587 both supplemented with 10  $\mu\text{g}/\text{mL}$  chloramphenicol (Cm) and 10  $\mu\text{M}$  (mild induction) or 100  
588  $\mu\text{M}$  (strong induction) of isopropyl  $\beta$ -D-1-thiogalactopyranoside (IPTG) (43714 5X, VWR  
589 Chemicals) when necessary.

590

### 591 *Time-kill curves*

592 Overnight cultures of BW25113 or SoA3329 and SoA3330 were diluted 1:1000 in pre-warmed  
593 LB or LB-Cm and LB-Cm-IPTG, respectively, and grown with shaking to  $\text{OD}_{600} \sim 0.5$ . A 1:3  
594 dilution series of ciprofloxacin was made and added to the cultures at indicated concentrations.  
595 Additional cultures without antibiotics and with a very high concentration of ciprofloxacin  
596 (2.187 mg/L) were used to determine the minimal and maximal kill rate, respectively. Samples  
597 were taken immediately prior to addition of the antibiotic and in  $\sim 20$  min intervals or after 45

598 min, respectively. Samples were washed once in phosphate buffered saline (PBS) before colony  
599 forming units (CFUs) were determined for each sample by plating a 1:10 dilution series in PBS  
600 on LB agar plates.

601

### 602 *GyrAB* quantification

603 To quantify the relative amount of GyrAB, samples of SoA3329 and SoA3330 were collected  
604 after 45 min of drug treatment as described above. An equal number of cells corresponding to 1  
605 mL culture at OD<sub>600</sub> = 1 were harvested by centrifugation. Pelleted cells were lysed at room  
606 temperature for 20 min using B-PER bacterial protein extraction reagent (90078, Thermo  
607 Scientific) supplemented with 100 µg/mL lysozyme, 5 units/mL DNaseI (all part of B-PER™  
608 with Enzymes Bacterial Protein Extraction Kit, 90078, Thermo Scientific) and 100 µM/mL  
609 PMSF (52332, Calbiochem). Samples were stored at -80°C until further use.

610 Samples were heated to 70°C for 10 min after addition of 1x Bolt sample reducing agent (B0009,  
611 Life Technologies) and 1x fluorescent compatible sample buffer (LC2570, Invitrogen). Proteins  
612 in whole-cell lysates were separated on 4-15 % Mini-Protean TGX Precast gels (456-1085, Bio-  
613 Rad) and transferred to 0.2 µm Nitrocellulose membranes (1704158, Bio-Rad).

614 Membranes were blocked in Odyssey blocking buffer-TBS (927-50000, Li-Cor) for at least one  
615 hour at room temperature. Primary antibodies raised against GyrA (Rabbit α-Gyrase A, PA005,  
616 Inspiralis), GyrB (Rabbit α-Gyrase B, PB005, Inspiralis), and CRP (Mouse α-*E. coli* CRP,  
617 664304, Nordic Biosite antibodies) were diluted 1:250, 1:250, and 1:2,000 in Odyssey blocking  
618 buffer-TBS, respectively. The blocked membranes were incubated with the appropriate primary  
619 antibodies overnight at 4°C, washed 4x for 15 min each in TBS-T solution (Tris buffered saline  
620 supplemented with Tween20: 0.138 M sodium chloride, 0.0027 M potassium chloride, 0.1 %

621 Tween20, pH 8.0 at 25°C), and incubated for 2 h at room temperature with fluorescent labelled  
622 secondary antibodies (1:10,000 of IRDye® 680RD Goat anti-Mouse IgG, P/N 925-68070, Li-  
623 Cor and 1:5000 of IRDye® 800CW Goat anti-Rabbit IgG, P/N 925-32211, Li-Cor) in Odyssey  
624 blocking buffer-TBS. Finally, the membranes were washed 4x for 15 min each in TBS-T  
625 solution and imaged at 700 nm and 800 nm using a Li-Cor Odyssey Sa scanning system.  
626 Band intensities were quantified from unmodified images using the record measurement tool of  
627 Photoshop CS6, normalized to the CRP loading control after background subtraction, and  
628 reported relative to SoA3330. For clarity, the “levels” tool of Photoshop CS6 was used to  
629 enhance the contrast of shown Western blot images.

630

### 631 **Data Availability**

632 Computer code will be available at <https://www.abel-zur-wiesch-lab.com/>.

633

### 634 **References**

635

- 636 1. Boeree MJ, Diacon AH, Dawson R, Narunsky K, du Bois J, Venter A, et al. A dose-ranging  
637 trial to optimize the dose of rifampin in the treatment of tuberculosis. *Am J Respir Crit Care Med.*  
638 2015;191(9):1058-65. doi: 10.1164/rccm.201407-1264OC. PubMed PMID: 25654354.
- 639 2. Lan AJ, Colford JM, Colford JM, Jr. The impact of dosing frequency on the efficacy of 10-  
640 day penicillin or amoxicillin therapy for streptococcal tonsillopharyngitis: A meta-analysis. *Pediatrics.*  
641 2000;105(2):E19. PubMed PMID: 10654979.
- 642 3. Roord JJ, Wolf BH, Gossens MM, Kimpen JL. Prospective open randomized study  
643 comparing efficacies and safeties of a 3-day course of azithromycin and a 10-day course of  
644 erythromycin in children with community-acquired acute lower respiratory tract infections.  
645 *Antimicrob Agents Chemother.* 1996;40(12):2765-8. PubMed PMID: 9124837; PubMed Central  
646 PMCID: PMC163618.
- 647 4. Van Deun A, Salim MA, Das AP, Bastian I, Portaels F. Results of a standardised regimen for  
648 multidrug-resistant tuberculosis in Bangladesh. *Int J Tuberc Lung Dis.* 2004;8(5):560-7. PubMed  
649 PMID: 15137531.
- 650 5. WHO. The shorter MDR-TB regimen.  
651 [http://www.who.int/tb/Short\\_MDR\\_regimen\\_factsheetpdf?ua=1](http://www.who.int/tb/Short_MDR_regimen_factsheetpdf?ua=1). 2016.

- 652 6. Waring MJ, Arrowsmith J, Leach AR, Leeson PD, Mandrell S, Owen RM, et al. An analysis  
653 of the attrition of drug candidates from four major pharmaceutical companies. *Nat Rev Drug*  
654 *Discov.* 2015;14(7):475-86. Epub 2015/06/20. doi: 10.1038/nrd4609. PubMed PMID: 26091267.
- 655 7. Kouyos RD, Metcalf CJ, Birger R, Klein EY, Abel zur Wiesch P, Ankomah P, et al. The  
656 path of least resistance: aggressive or moderate treatment? *Proc Biol Sci.* 2014;281(1794):20140566.  
657 doi: 10.1098/rspb.2014.0566. PubMed PMID: 25253451; PubMed Central PMCID:  
658 PMCPMC4211439.
- 659 8. Read AF, Day T, Huijben S. The evolution of drug resistance and the curious orthodoxy of  
660 aggressive chemotherapy. *Proc Natl Acad Sci U S A.* 2011;108 Suppl 2:10871-7. doi:  
661 10.1073/pnas.1100299108. PubMed PMID: 21690376; PubMed Central PMCID:  
662 PMCPMC3131826.
- 663 9. Colijn C, Cohen T. How competition governs whether moderate or aggressive treatment  
664 minimizes antibiotic resistance. *Elife.* 2015;4. doi: 10.7554/eLife.10559. PubMed PMID: 26393685;  
665 PubMed Central PMCID: PMCPMC4641510.
- 666 10. Drlica K, Zhao X. Mutant selection window hypothesis updated. *Clin Infect Dis.*  
667 2007;44(5):681-8. doi: 10.1086/511642. PubMed PMID: 17278059.
- 668 11. Gullberg E, Cao S, Berg OG, Ilback C, Sandegren L, Hughes D, et al. Selection of resistant  
669 bacteria at very low antibiotic concentrations. *PLoS Pathog.* 2011;7(7):e1002158. doi:  
670 10.1371/journal.ppat.1002158. PubMed PMID: 21811410; PubMed Central PMCID:  
671 PMCPMC3141051.
- 672 12. Drlica K. The mutant selection window and antimicrobial resistance. *J Antimicrob*  
673 *Chemother.* 2003;52(1):11-7. Epub 2003/06/14. doi: 10.1093/jac/dkg269. PubMed PMID:  
674 12805267.
- 675 13. Sommer MOA, Munck C, Toft-Kehler RV, Andersson DI. Prediction of antibiotic  
676 resistance: time for a new preclinical paradigm? *Nat Rev Microbiol.* 2017;15(11):689-96. Epub  
677 2017/08/02. doi: 10.1038/nrmicro.2017.75. PubMed PMID: 28757648.
- 678 14. Muliaditan M, Davies GR, Simonsson USH, Gillespie SH, Della Pasqua O. The implications  
679 of model-informed drug discovery and development for tuberculosis. *Drug Discov Today.*  
680 2017;22(3):481-6. Epub 2016/10/26. doi: 10.1016/j.drudis.2016.09.004. PubMed PMID: 27693714.
- 681 15. Walkup GK, You Z, Ross PL, Allen EK, Daryae F, Hale MR, et al. Translating slow-  
682 binding inhibition kinetics into cellular and in vivo effects. *Nat Chem Biol.* 2015;11(6):416-23. Epub  
683 2015/04/22. doi: 10.1038/nchembio.1796. PubMed PMID: 25894085; PubMed Central PMCID:  
684 PMCPMC4536915.
- 685 16. Sykes DA, Moore H, Stott L, Holliday N, Javitch JA, Lane JR, et al. Extrapyramidal side  
686 effects of antipsychotics are linked to their association kinetics at dopamine D2 receptors. *Nat*  
687 *Commun.* 2017;8(1):763. Epub 2017/10/04. doi: 10.1038/s41467-017-00716-z. PubMed PMID:  
688 28970469; PubMed Central PMCID: PMCPMC5624946.
- 689 17. Shen L, Rabi SA, Sedaghat AR, Shan L, Lai J, Xing S, et al. A critical subset model provides  
690 a conceptual basis for the high antiviral activity of major HIV drugs. *Sci Transl Med.*  
691 2011;3(91):91ra63. doi: 10.1126/scitranslmed.3002304. PubMed PMID: 21753122; PubMed Central  
692 PMCID: PMCPMC3488347.
- 693 18. Abel zur Wiesch P, Abel S, Gkatzis S, Ocampo P, Engelstadter J, Hinkley T, et al. Classic  
694 reaction kinetics can explain complex patterns of antibiotic action. *Sci Transl Med.* 2015;7(287). doi:  
695 ARTN 287ra73  
696 10.1126/scitranslmed.aaa8760. PubMed PMID: WOS:000354433900001.
- 697 19. Aldred KJ, Kerns RJ, Osheroff N. Mechanism of quinolone action and resistance.  
698 *Biochemistry.* 2014;53(10):1565-74. Epub 2014/03/01. doi: 10.1021/bi5000564. PubMed PMID:  
699 24576155; PubMed Central PMCID: PMCPMC3985860.

- 700 20. Shen LL, Pernet AG. Mechanism of inhibition of DNA gyrase by analogues of nalidixic acid:  
701 the target of the drugs is DNA. *Proc Natl Acad Sci U S A*. 1985;82(2):307-11. PubMed PMID:  
702 2982149; PubMed Central PMCID: PMCPMC397026.
- 703 21. Shen LL, Mitscher LA, Sharma PN, O'Donnell TJ, Chu DW, Cooper CS, et al. Mechanism  
704 of inhibition of DNA gyrase by quinolone antibacterials: a cooperative drug-DNA binding model.  
705 *Biochemistry*. 1989;28(9):3886-94. PubMed PMID: 2546585.
- 706 22. Andriole VT. <<The>> quinolones. 3rd ed. San Diego: Academic Press; 2000. XX, 517 S.  
707 p.
- 708 23. Jungkind DL, American Society for Microbiology Eastern Pennsylvania Branch.  
709 Antimicrobial resistance a crisis in health care. New York etc.: Plenum Press; 1995. X, 248 S. p.
- 710 24. Kampranis SC, Maxwell A. The DNA gyrase-quinolone complex. ATP hydrolysis and the  
711 mechanism of DNA cleavage. *J Biol Chem*. 1998;273(35):22615-26. Epub 1998/08/26. PubMed  
712 PMID: 9712890.
- 713 25. Siporin C, Heifetz CL, Domagala JM. The New generation of quinolones. New York: M.  
714 Dekker; 1990. xii, 347 p., 2 p. of plates p.
- 715 26. Abel Zur Wiesch P, Clarelli F, Cohen T. Using Chemical Reaction Kinetics to Predict  
716 Optimal Antibiotic Treatment Strategies. *PLoS Comput Biol*. 2017;13(1):e1005321. doi:  
717 10.1371/journal.pcbi.1005321. PubMed PMID: 28060813; PubMed Central PMCID:  
718 PMCPMC5257006.
- 719 27. Elliott TS, Shelton A, Greenwood D. The response of *Escherichia coli* to ciprofloxacin and  
720 norfloxacin. *J Med Microbiol*. 1987;23(1):83-8. Epub 1987/02/01. doi: 10.1099/00222615-23-1-83.  
721 PubMed PMID: 3546699.
- 722 28. Silva F, Lourenco O, Queiroz JA, Domingues FC. Bacteriostatic versus bactericidal activity  
723 of ciprofloxacin in *Escherichia coli* assessed by flow cytometry using a novel far-red dye. *J Antibiot*  
724 (Tokyo). 2011;64(4):321-5. Epub 2011/02/18. doi: 10.1038/ja.2011.5. PubMed PMID: 21326251.
- 725 29. Garoff L, Yadav K, Hughes D. Increased expression of Qnr is sufficient to confer clinical  
726 resistance to ciprofloxacin in *Escherichia coli*. *J Antimicrob Chemother*. 2018;73(2):348-52. Epub  
727 2017/11/07. doi: 10.1093/jac/dkx375. PubMed PMID: 29106520; PubMed Central PMCID:  
728 PMCPMC5890660.
- 729 30. Sulavik MC, Houseweart C, Cramer C, Jiwani N, Murgolo N, Greene J, et al. Antibiotic  
730 susceptibility profiles of *Escherichia coli* strains lacking multidrug efflux pump genes. *Antimicrob*  
731 *Agents Chemother*. 2001;45(4):1126-36. Epub 2001/03/21. doi: 10.1128/AAC.45.4.1126-  
732 1136.2001. PubMed PMID: 11257026; PubMed Central PMCID: PMCPMC90435.
- 733 31. Regoes RR, Wiuff C, Zappala RM, Garner KN, Baquero F, Levin BR. Pharmacodynamic  
734 functions: a multiparameter approach to the design of antibiotic treatment regimens. *Antimicrob*  
735 *Agents Chemother*. 2004;48(10):3670-6. doi: 10.1128/AAC.48.10.3670-3676.2004. PubMed PMID:  
736 15388418; PubMed Central PMCID: PMCPMC521919.
- 737 32. Palmer AC, Kishony R. Opposing effects of target overexpression reveal drug mechanisms.  
738 *Nat Commun*. 2014;5:4296. Epub 2014/07/02. doi: 10.1038/ncomms5296. PubMed PMID:  
739 24980690; PubMed Central PMCID: PMCPMC4408919.
- 740 33. Fontana W. Lecture Notes: Continuous-Time Monte-Carlo of Reaction Systems.
- 741 34. Ocampo PS, Lazar V, Papp B, Arnoldini M, Abel zur Wiesch P, Busa-Fekete R, et al.  
742 Antagonism between bacteriostatic and bactericidal antibiotics is prevalent. *Antimicrob Agents*  
743 *Chemother*. 2014;58(8):4573-82. Epub 2014/05/29. doi: 10.1128/AAC.02463-14. PubMed PMID:  
744 24867991; PubMed Central PMCID: PMCPMC4135978.
- 745 35. Chambers HF, Sachdeva MJ, Hackbarth CJ. Kinetics of penicillin binding to penicillin-  
746 binding proteins of *Staphylococcus aureus*. *Biochem J*. 1994;301 ( Pt 1):139-44. PubMed PMID:  
747 8037661; PubMed Central PMCID: PMCPMC1137153.

- 748 36. Al-Emran HM, Heisig A, Dekker D, Adu-Sarkodie Y, Cruz Espinoza LM, Panzner U, et al.  
749 Detection of a Novel gyrB Mutation Associated With Fluoroquinolone-Nonsusceptible Salmonella  
750 enterica serovar Typhimurium Isolated From a Bloodstream Infection in Ghana. *Clin Infect Dis*.  
751 2016;62 Suppl 1:S47-9. Epub 2016/03/05. doi: 10.1093/cid/civ790. PubMed PMID: 26933021.
- 752 37. Vogwill T, MacLean RC. The genetic basis of the fitness costs of antimicrobial resistance: a  
753 meta-analysis approach. *Evol Appl*. 2015;8(3):284-95. Epub 2015/04/11. doi: 10.1111/eva.12202.  
754 PubMed PMID: 25861386; PubMed Central PMCID: PMCPCMC4380922.
- 755 38. Jorgensen JH, Ferraro MJ. Antimicrobial susceptibility testing: a review of general principles  
756 and contemporary practices. *Clin Infect Dis*. 2009;49(11):1749-55. Epub 2009/10/28. doi:  
757 10.1086/647952. PubMed PMID: 19857164.
- 758 39. Tonge PJ. Drug-Target Kinetics in Drug Discovery. *ACS Chem Neurosci*. 2018;9(1):29-39.  
759 Epub 2017/06/24. doi: 10.1021/acschemneuro.7b00185. PubMed PMID: 28640596; PubMed  
760 Central PMCID: PMCPCMC5767540.
- 761 40. Metcalf BJ, Chochua S, Gertz RE, Jr., Li Z, Walker H, Tran T, et al. Using whole genome  
762 sequencing to identify resistance determinants and predict antimicrobial resistance phenotypes for  
763 year 2015 invasive pneumococcal disease isolates recovered in the United States. *Clin Microbiol*  
764 *Infect*. 2016;22(12):1002 e1- e8. Epub 2016/08/21. doi: 10.1016/j.cmi.2016.08.001. PubMed PMID:  
765 27542334.
- 766 41. Eyre DW, De Silva D, Cole K, Peters J, Cole MJ, Grad YH, et al. WGS to predict antibiotic  
767 MICs for *Neisseria gonorrhoeae*. *J Antimicrob Chemother*. 2017;72(7):1937-47. Epub 2017/03/24.  
768 doi: 10.1093/jac/dkx067. PubMed PMID: 28333355; PubMed Central PMCID: PMCPCMC5890716.
- 769 42. Payne DJ, Gwynn MN, Holmes DJ, Pompliano DL. Drugs for bad bugs: confronting the  
770 challenges of antibacterial discovery. *Nat Rev Drug Discov*. 2007;6(1):29-40. Epub 2006/12/13. doi:  
771 10.1038/nrd2201. PubMed PMID: 17159923.
- 772 43. van der Putten BC, Pasquini G, Remondini D, Janes VA, Matamoros S, Schultsz C.  
773 Quantifying the contribution of four resistance mechanisms to ciprofloxacin minimum inhibitory  
774 concentration in *Escherichia coli*: a systematic review. 2018:372086. doi: 10.1101/372086 %J  
775 bioRxiv.
- 776 44. Copeland RA. The drug-target residence time model: a 10-year retrospective. *Nat Rev Drug*  
777 *Discov*. 2016;15(2):87-95. Epub 2015/12/19. doi: 10.1038/nrd.2015.18. PubMed PMID: 26678621.
- 778 45. Srimani JK, Huang S, Lopatkin AJ, You L. Drug detoxification dynamics explain the  
779 postantibiotic effect. *Mol Syst Biol*. 2017;13(10):948. Epub 2017/10/25. doi:  
780 10.15252/msb.20177723. PubMed PMID: 29061668; PubMed Central PMCID: PMCPCMC5658699.
- 781 46. Cramariuc O, Rog T, Javanainen M, Monticelli L, Polishchuk AV, Vattulainen I. Mechanism  
782 for translocation of fluoroquinolones across lipid membranes. *Biochim Biophys Acta*.  
783 2012;1818(11):2563-71. Epub 2012/06/06. doi: 10.1016/j.bbamem.2012.05.027. PubMed PMID:  
784 22664062.
- 785 47. Hirsch C. Numerical computation of internal and external flows : introduction to the  
786 fundamentals of CFD. Oxford: Butterworth-Heinemann,; 2007. Available from:  
787 <http://app.knovel.com/web/toc.v/cid:kpNCIEFFFC2>.
- 788 48. Wu J, Zhang Z, Mitchenall LA, Maxwell A, Deng J, Zhang H, et al. The dimer state of GyrB  
789 is an active form: implications for the initial complex assembly and processive strand passage.  
790 *Nucleic Acids Res*. 2011;39(19):8488-502. Epub 2011/07/13. doi: 10.1093/nar/gkr553. PubMed  
791 PMID: 21745817; PubMed Central PMCID: PMCPCMC3201873.
- 792 49. Maier T, Schmidt A, Guell M, Kuhner S, Gavin AC, Aebersold R, et al. Quantification of  
793 mRNA and protein and integration with protein turnover in a bacterium. *Mol Syst Biol*. 2011;7:511.  
794 Epub 2011/07/21. doi: 10.1038/msb.2011.38. PubMed PMID: 21772259; PubMed Central  
795 PMCID: PMCPCMC3159969.



- 796 50. Malmstrom J, Beck M, Schmidt A, Lange V, Deutsch EW, Aebersold R. Proteome-wide  
797 cellular protein concentrations of the human pathogen *Leptospira interrogans*. *Nature*.  
798 2009;460(7256):762-5. Epub 2009/07/17. doi: 10.1038/nature08184. PubMed PMID: 19606093;  
799 PubMed Central PMCID: PMCPMC2723184.
- 800 51. Datsenko KA, Wanner BL. One-step inactivation of chromosomal genes in *Escherichia coli*  
801 K-12 using PCR products. *Proc Natl Acad Sci U S A*. 2000;97(12):6640-5. Epub 2000/06/01. doi:  
802 10.1073/pnas.120163297. PubMed PMID: 10829079; PubMed Central PMCID: PMCPMC18686.
- 803 52. Martinecz A, Abel Zur Wiesch P. Estimating treatment prolongation for persistent  
804 infections. *Pathog Dis*. 2018;76(6). Epub 2018/08/15. doi: 10.1093/femspd/fty065. PubMed  
805 PMID: 30107522; PubMed Central PMCID: PMCPMC6134427.
- 806

807

## 808 **Acknowledgements**

809 We thank Jingyi Liang, Vi Tran, Antal Martinecz, Giovanni Montani, Forrest W. Crawford,  
810 Roberto Natalini, Klaus Harms, Christoph Zimmer, Angelo Vannozzi and Rafal Mostowy for  
811 helpful discussions and feedback on the manuscript. We would like to acknowledge R. Regoes  
812 for providing previously published raw data. This work was funded by Bill and Melinda Gates  
813 Foundation Grant OPP1111658 (to T.C. & P.AzW.), Research Council of Norway (NFR) Grant  
814 262686 (to P.AzW.) and 249979 (to S.A.), and Helse-Nord Grant 14796 (to S.A.).

815

## 816 **Author Contributions**

817 P.AzW. designed the study. F.C. developed the mathematical models. A.P., B.S., M.S., and S.A.  
818 designed the experiments. A.P., B.S., M.S., and S.L. performed the experiments. F.C., A.P., B.S.,  
819 M.S., T.C., S.A., and P.AzW. analyzed the data. T.C., S.A., and P.AzW. wrote the manuscript.

820

## 821 **Competing Interests statement**

822 The authors declare no competing interests.

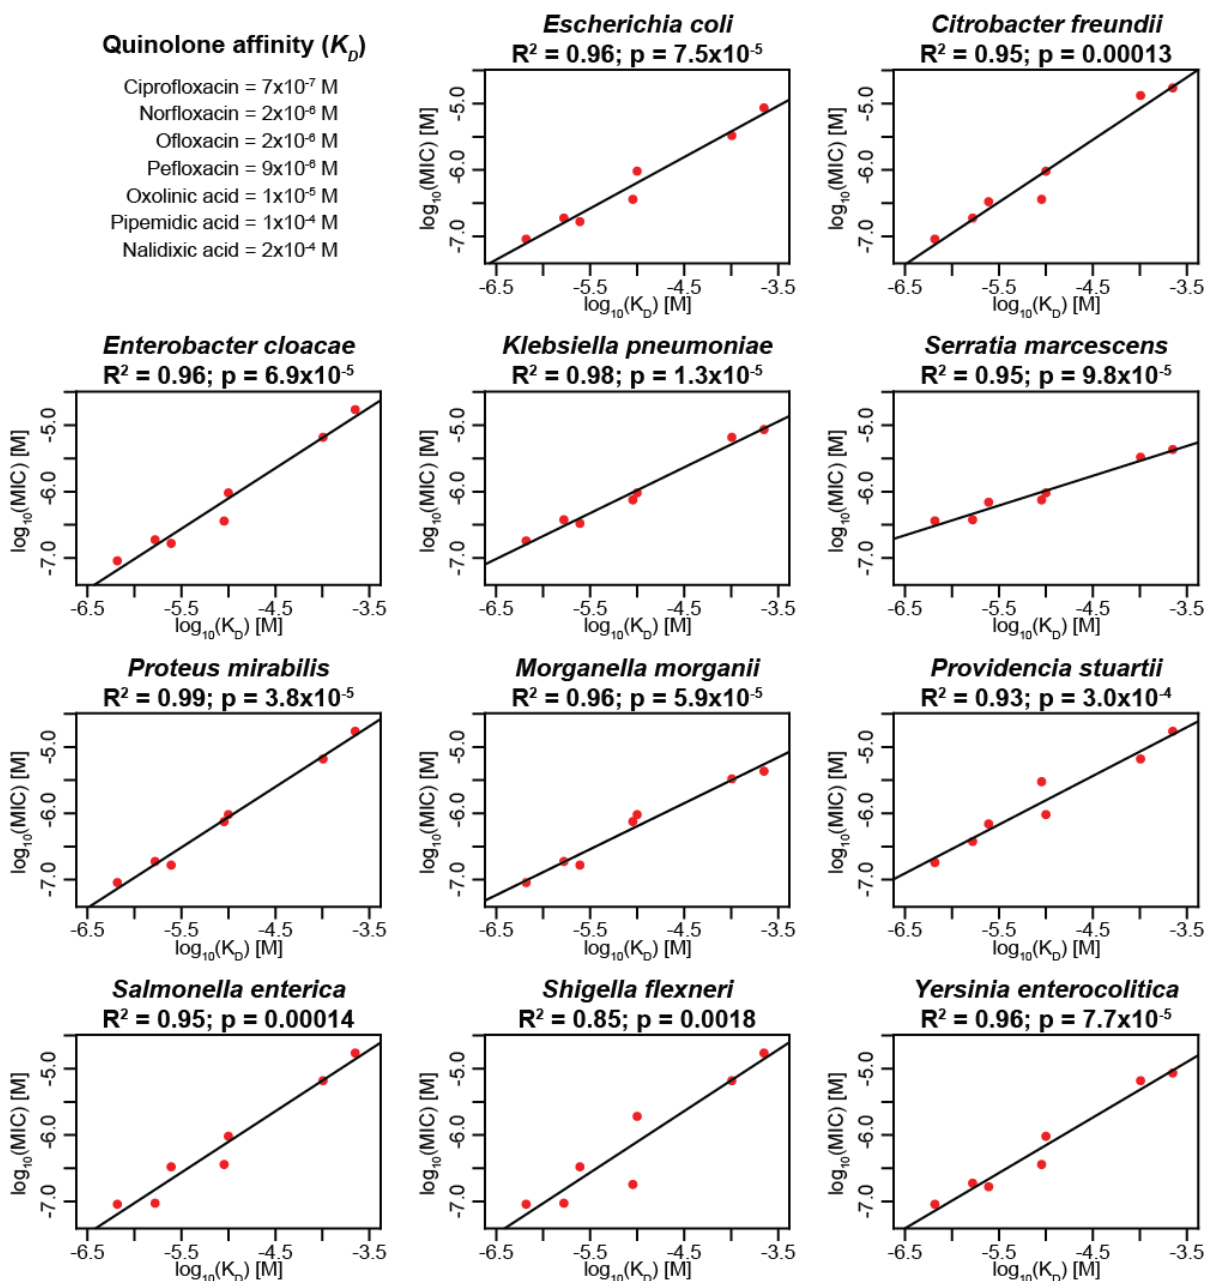

823

824 **Fig. 1| Clinical data confirm linear correlation between MICs and affinities of quinolones to**

825 **gyrase.** We analyzed MIC and drug-target affinity data from 11 Enterobacteriaceae isolates and

826 seven different quinolones. The x-axes show the affinities ( $K_D$ ) as reported in the literature[21,

827 23-25], and the y-axes show the MICs, both in mol/L. The adjusted  $R^2$  and p-value of each

828 correlation are given. In cases where there was more than one  $K_D$  value reported in the literature,

829 we used the mean for this analysis. The tested MIC values are the median of several clinical  
830 isolates described previously[25].

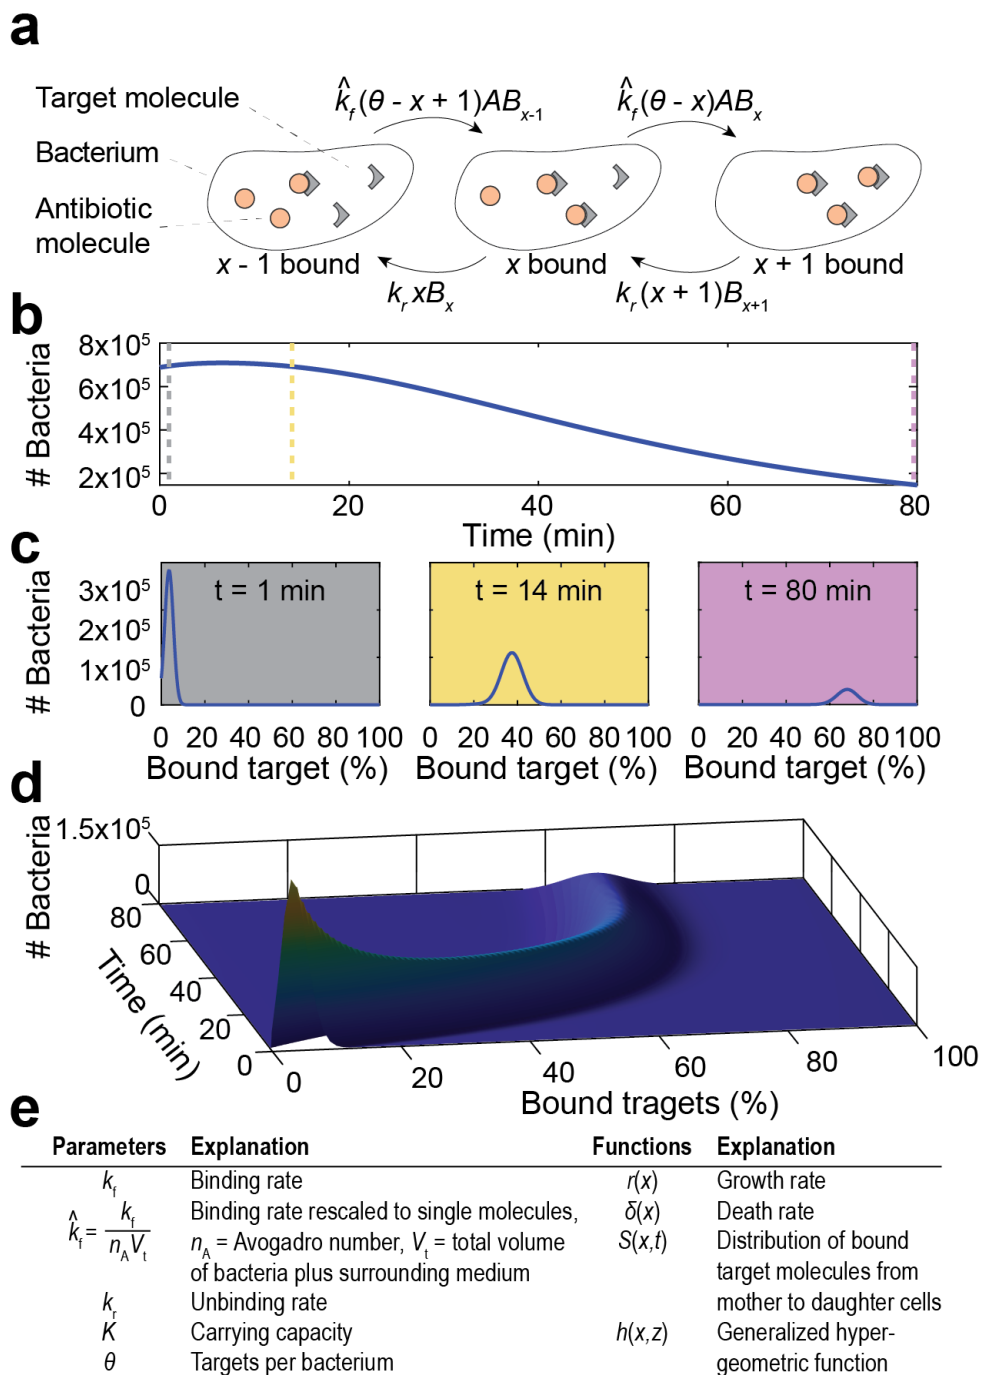

831  
 832 **Fig. 2| Illustration of modeling approach.** **a**, Schematic illustration of binding kinetics (adapted  
 833 from [52]). The grey triangles depict the drug target molecules, and the orange circles represent  
 834 antibiotic molecules within bacteria. The arrows indicate individual binding and unbinding  
 835 events of the antibiotic to its target molecule in the cell.  $\hat{k}_f$  is the adjusted forward reaction rate,

836  $k_r$  is the reverse reaction rate,  $A$  is the concentration of antibiotics inside the bacterium,  $x$  is the  
837 number of bound targets,  $\theta$  is the number of targets and  $B_x$  is the number of bacteria with  $x$  bound  
838 targets. **b**, Modeled sample time-kill curve, in which the sum of bacteria in all binding states (i.e.,  
839 the entire population of living bacteria) is followed over time after exposure to antibiotics. The  
840 vertical dotted lines indicate the time points depicted in **(c)**; 1 min (grey), 14 min (yellow), and  
841 80 min (purple). **c**, The percentage of bound antibiotic targets in the bacterial population at  
842 indicated time points. **d**, Illustration of how the partial differential equation describes the  
843 bacterial population as a surface in a three-dimensional coordinate system, the dimensions of  
844 which represent percent bound target (x-axis), time (y-axis), and number of bacteria (z-axis). The  
845 three time points shown in **(c)** represent two-dimensional cross-sections at different points of the  
846 y-axis. **e**, Overview of used parameters and functions.

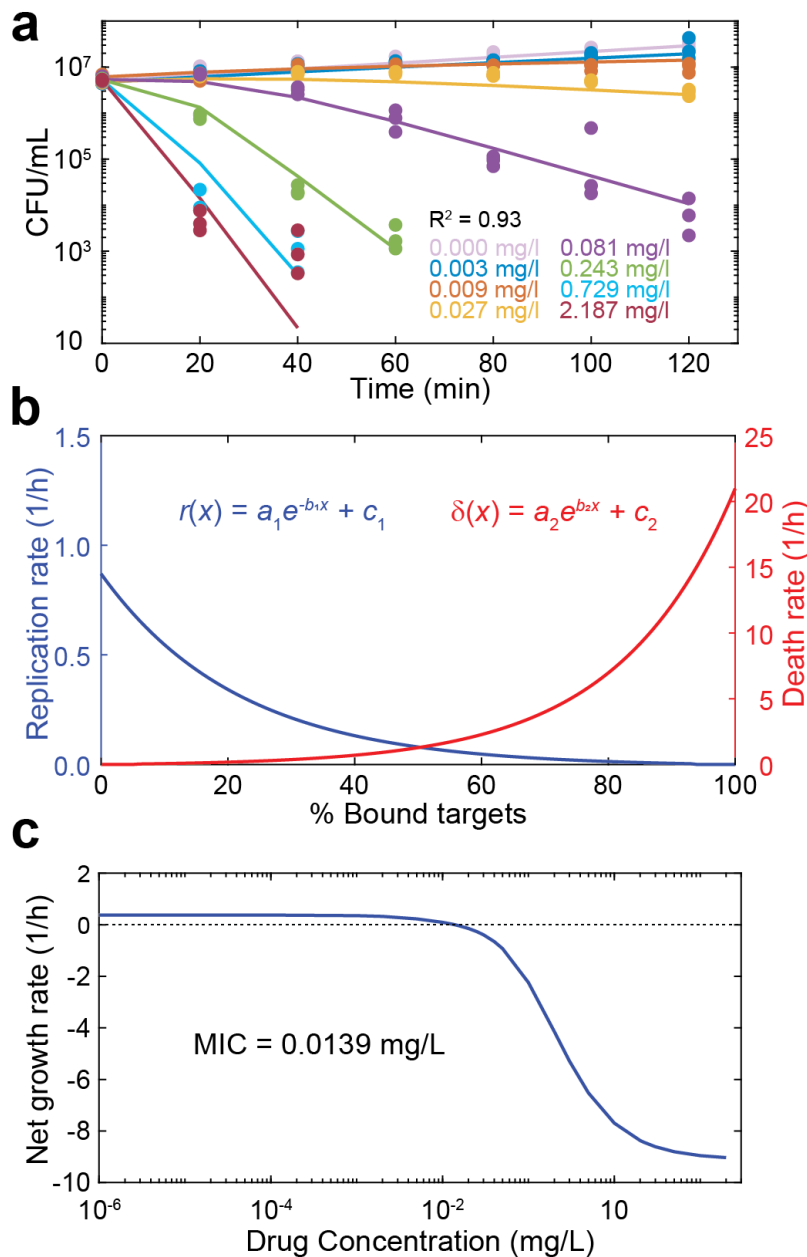

847

848 **Fig. 3| Model predictions for the MIC and the bacteriostatic and bactericidal effects of**

849 **ciprofloxacin.** **a**, Model fit to experimental time-kill curves. The points indicate the

850 experimental data of three independent replicates, and the lines indicate the model fit. Each color

851 indicates a ciprofloxacin concentration as reported in the figure. **b**, The blue line indicates the

852 bacteriostatic effect ( $r(x)$ , replication rate) of ciprofloxacin and the red line the bactericidal effect

853 ( $\delta(x)$ , death rate) as a function of the number of bound targets predicted by the model fit in **(a)**.

854 The values of the fitted parameters are listed in Supplementary Tab. S2. **c**, The net growth rate as  
855 determined by the slope of a line connecting the initial bacterial density and the final bacterial  
856 density of a time-kill curve at 18 h on a logarithmic scale, is given as function of the drug  
857 concentration (blue). The dotted horizontal line indicates zero net growth, and the intersection  
858 with the blue line predicts the MIC (0.0139 mg/mL).

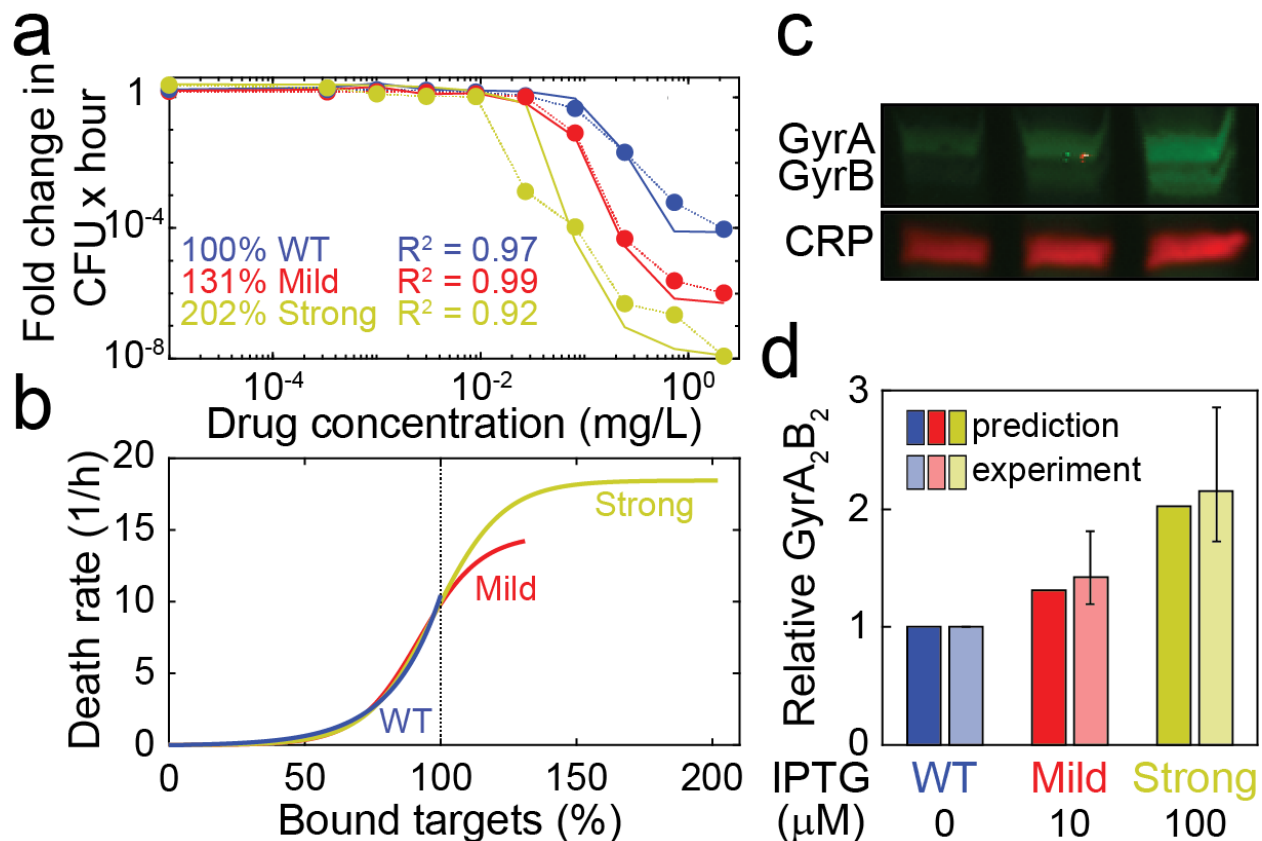

859

860 **Fig. 4| Prediction of relative antibiotic target molecule content from time-kill curves. a,**  
 861 Dose-response curves of *E. coli* expressing *gyrA* and *gyrB* under the same IPTG-inducible  
 862 promoter (SoA3329) grown in the presence of 10 μM IPTG (mild overexpression; red) and 100  
 863 μM IPTG (strong overexpression; yellow). A control strain (SoA3330), which expresses wild-  
 864 type GyrAB levels and contains a mock plasmid, is grown in the absence of inducer (blue). The  
 865 x-axis indicates the ciprofloxacin concentration, and the y-axis indicates the fold change in  
 866 colony forming units over time. The dotted lines indicate experimental data, and the solid lines  
 867 indicate the model fit. The best model fit was obtained for relative target molecule contents of  
 868 131 % (mild overexpression) and 202 % (strong overexpression) relative to the control strain  
 869 (WT). **b,** Death rates of *E. coli* expressing different levels of GyrAB. The colors represent  
 870 GyrAB expression conditions as in (a). The x-axis shows the percentage of bound antibiotic



871 target normalized to the control strain; the y-axis shows the death rate  $\delta(x)$ . Each line represents  
872 the best fit for  $\delta(x)$ . **c**, Western blot analysis of GyrA&B in the strains/conditions shown in **(a)**.  
873 CRP (cAMP receptor protein) was used as loading control. A representative example of six  
874 replicates is shown; see Supplementary Fig. S2 for full blots. **d**, comparison of theoretical  
875 prediction (from **(b)**, solid colors) and GyrA<sub>2</sub>B<sub>2</sub> tetramer levels estimated from relative GyrA&B  
876 monomer levels (quantified in **(c)**, translucent colors). For the experimental measurements, the  
877 bars indicate the mean, and the whiskers represent the 95 % confidence interval.

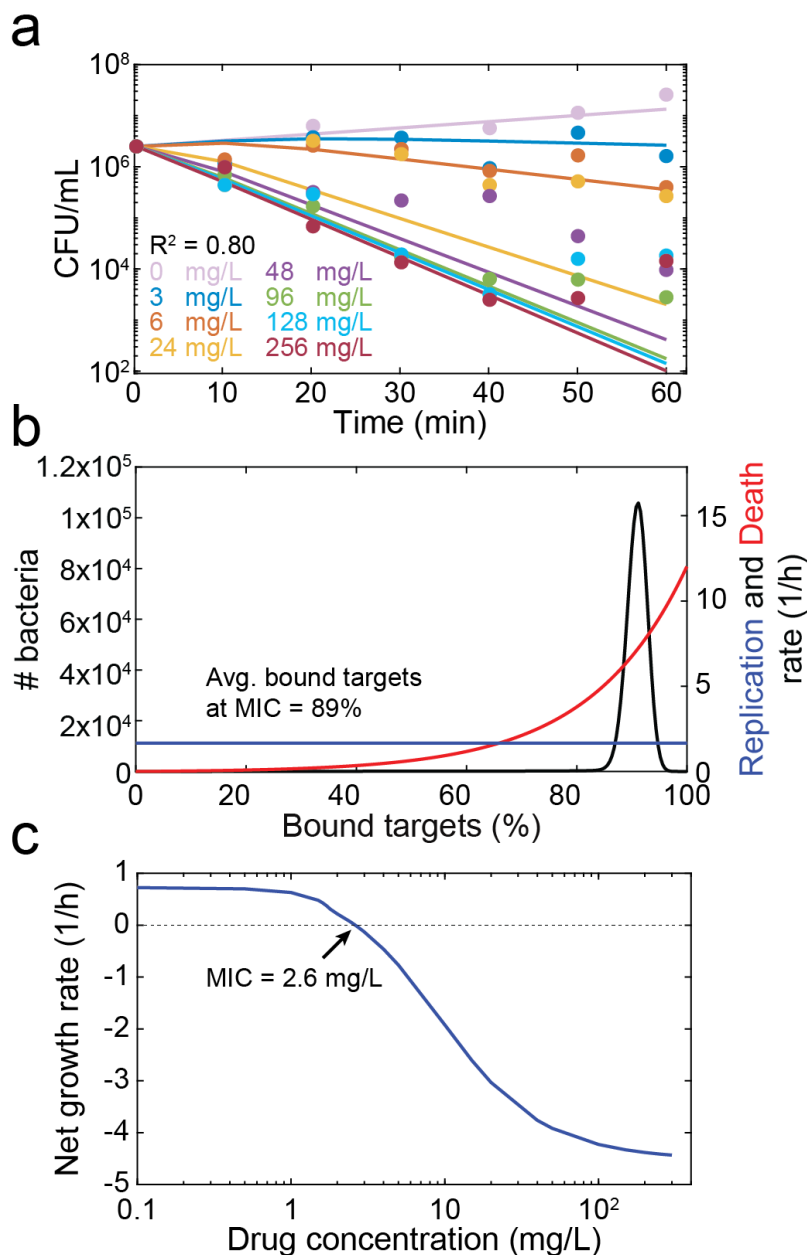

878

879 **Fig. 5| Model prediction of MIC and target occupancy at MIC for ampicillin.** a, Model fit to  
880 previously published time-kill curves[31]. The points represent experimental data, and the lines  
881 represent the fit of the model. Each color indicates a single ampicillin concentration, as described  
882 in the legend. b, Replication (blue) and death (red) rates as a function of the number of bound  
883 targets predicted by the model fit in (a). The black line indicates the predicted distribution of  
884 target occupancies in a bacterial population (both living and dead cells) exposed to ampicillin at

885 the MIC for 18 h. **c**, The net growth rate, as determined by the slope of a line connecting the  
886 initial bacterial density and the bacterial density at 18 h on a logarithmic scale predicted from the  
887 model fit in **(a)**, is shown as function of the drug concentration (blue). The dotted horizontal line  
888 indicates zero net growth, and the intersection with the blue line predicts the MIC (2.6 mg/mL).

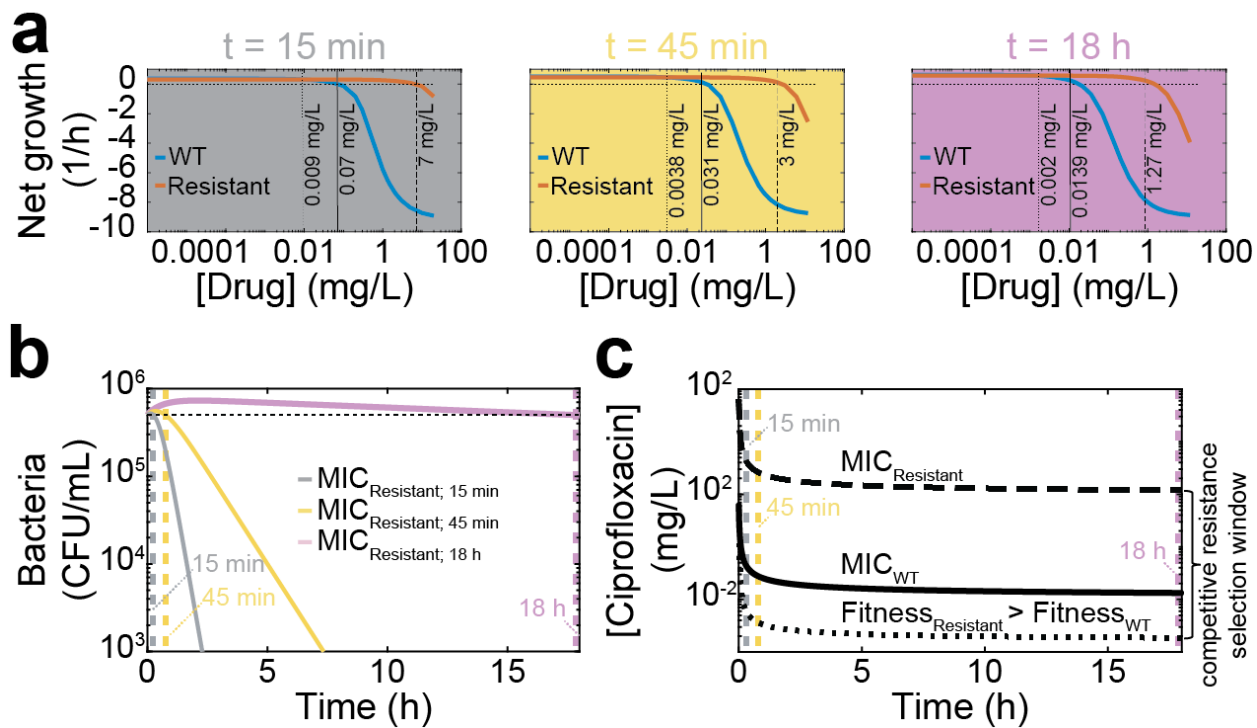

889

890 **Fig. 6| Predicted mutation selection windows for *E. coli* exposed to ciprofloxacin. a**, The

891 drug concentration of ciprofloxacin is shown on the x-axes, and the average bacterial net growth

892 rate in the first 15 min (grey panel), 45 min (yellow panel), and 18 h (purple panel) of exposure

893 is given on the y-axes. The blue line represents the wild-type strain based on the fits shown in

894 Fig. 3, and the red line represents a strain with a hypothetical resistance mutation that decreases

895 the binding rate ( $k_f$ ) 100-fold and imparts a 15 % fitness cost. The horizontal dotted line indicates

896 no net growth. The vertical dotted line indicates where the resistant strain becomes more fit than

897 the wild-type, the solid vertical line indicates the MIC of the wild-type, and the dashed vertical

898 line indicates the MIC of the resistant strain. **b**, Modeled time kill curves of the resistant strain

899 for ciprofloxacin concentrations at which there is no growth at 15 min (grey; MIC<sub>15 min</sub> = 7

900 mg/L), 45 min (yellow; MIC<sub>45 min</sub> = 3 mg/L) and 18 h (purple; MIC<sub>18 h</sub> = 1.27 mg/L). The

901 horizontal dotted line indicates the initial population size; the vertical dotted lines represent the

902 time points at which the initial and final population size is the same. **c**, The mutation selection

903 window depends on the time at which bacterial growth is observed. The x-axis shows the  
904 observed time at which replication rates were determined, the y-axis shows ciprofloxacin  
905 concentrations. The dotted curve shows the ciprofloxacin concentration at which the resistant  
906 becomes fitter than the WT ( $\text{Fitness}_{\text{Resistant}} > \text{Fitness}_{\text{WT}}$ ), the solid line the MIC of the WT  
907 ( $\text{MIC}_{\text{WT}}$ ), and the dashed line the MIC of the resistant strain ( $\text{MIC}_{\text{Resistant}}$ ). The area between the  
908 dotted and dashed line indicates the competitive resistance selection window.
